# Supplementary material for: Distribution, sources and exposure risk of polycyclic aromatic hydrocarbons in soils, and indoor and outdoor dust from Port Harcourt city, Nigeria
Source: Royal Society of Chemistry journal article supplement (doi:10.1039/d1em00094b), 2021-01-01
Supplement: d1em00094b1.pdf [file d1em00094b1.pdf]

# **Distribution, sources and exposure risk of polycyclic aromatic hydrocarbons in soils, and indoor and outdoor dust from Port Harcourt City, Nigeria**

Chinedu J. **Ossai**<sup>1</sup>, Chukwujindu M.A. **Iwegbue**<sup>1\*</sup>, Godswill O. **Tesi**<sup>2</sup>, Chijioke **Olisah**<sup>3</sup>, Francis E. **Egobueze**<sup>4</sup>, Godwin E. **Nwajei**<sup>1</sup> and Bice S. **Martincigh**<sup>5</sup>

<sup>1</sup>Department of Chemistry, Delta State University, P.M.B. 1, Abraka, Nigeria

<sup>2</sup>Department of Chemical Sciences, University of Africa, Toru-Orua, Bayelsa State, Nigeria

<sup>3</sup>Institute for Coastal and Marine Research, Department of Botany, Nelson Mandela University, Port Elizabeth 6031, South Africa

<sup>4</sup>Nigerian Agip Oil Company, Rumueme, Port Harcourt, Nigeria

<sup>5</sup>School of Chemistry and Physics, University of KwaZulu-Natal, Westville Campus, Private Bag X54001, Durban 4000, South Africa

\*Corresponding author e-mail: [maxpriestley@yahoo.com](mailto:maxpriestley@yahoo.com); [cmaiwegbue@delsu.edu.ng](mailto:cmaiwegbue@delsu.edu.ng)

## **Supplementary Materials**

**Table S1:** Information on the characteristic nature of the sampling sites

| <b>Sample Code</b> | <b>Sampling point</b>          | <b>Type of Home/Sampling points characteristics</b>                                                                  | <b>Matrix Type</b>    | <b>No of Samples</b> |
|--------------------|--------------------------------|----------------------------------------------------------------------------------------------------------------------|-----------------------|----------------------|
| 1                  | Trans Amadihome                | Industrial area                                                                                                      | Indoor, Outdoor, Soil | 3                    |
| 2                  | Rumuokurushihome               | High income earner                                                                                                   | Indoor, Outdoor, Soil | 3                    |
| 3                  | Trinity Graden Estate home     | High income earner                                                                                                   | Indoor, Outdoor, Soil | 3                    |
| 4                  | Valley of Decision Estate      | Low income earner                                                                                                    | Indoor, Outdoor, Soil | 3                    |
| 5                  | Atali home                     | Low income earner                                                                                                    | Indoor, Outdoor, Soil | 3                    |
| 6                  | Abuluomahome                   | Low income earner, jetty, bunker activity                                                                            | Indoor, Outdoor, Soil | 3                    |
| 7                  | Rumuokoro store                | Electronic shop, Traffic density                                                                                     | Indoor, Outdoor, Soil | 3                    |
| 8                  | Diobu printing/photocopy shops | Commercial Paper/Screen Printing, Binding                                                                            | Indoor, Outdoor, Soil | 3                    |
| 9                  | Eneka home                     | High income earner                                                                                                   | Indoor, Outdoor, Soil | 3                    |
| 10                 | GRA home                       | High income earner, commercial offices                                                                               | Indoor, Outdoor, Soil | 3                    |
| 11                 | Rumuola (lock-up house)        | Lock-up house, traffic density, pleasure park                                                                        | Indoor, Outdoor, Soil | 3                    |
| 12                 | Wojihome                       | Low income earner, jetty area, traffic                                                                               | Indoor, Outdoor, Soil | 3                    |
| 13                 | Station Road                   | Shopping mall, railway terminal, jetty, bunker activity                                                              | Indoor, Outdoor, Soil | 3                    |
| 14                 | Artillery Electronic Repairs   | Sales and repair of GSM phones, traffic density                                                                      | Indoor, Outdoor, Soil | 3                    |
| 15                 | Eleme home                     | Electronic shops, fertilizer and petrochemical company, refinery, illegal sale of petroleum products by roadside     | Indoor, Outdoor, Soil | 3                    |
| 16                 | Onne shop                      | Trailer parks, sea port, sale of second-hand electronics materials, illegal sale of petroleum products in jerry cans | Indoor, Outdoor, Soil | 3                    |
| 17                 | Obigbo home                    | Low income earner, gas flare                                                                                         | Indoor, Outdoor, Soil | 3                    |
| 18                 | Afam home                      | Gas and steam power plant area, gas flare                                                                            | Indoor, Outdoor, Soil | 3                    |
| 19                 | Waterlines store               | High traffic density, commercial businesses                                                                          | Indoor, Outdoor, Soil | 3                    |
| 20                 | Choba home                     | University environment, business centres                                                                             | Indoor, Outdoor, Soil | 3                    |

**Table S2:** Values of  $C_{QV(NCs)}$  and  $C_{QV(MPCs)}$  (in  $\mu\text{g kg}^{-1}$ ) for individual PAHs<sup>1</sup>

| <b>PAH Compound</b> | <b><math>C_{QV(NCs)}</math></b> | <b><math>C_{QV(MPCs)}</math></b> |
|---------------------|---------------------------------|----------------------------------|
| Nap                 | 6.9                             | 690                              |
| Acy                 | 1.7                             | 170                              |
| Ace                 | 6.8                             | 680                              |
| Flu                 | 16                              | 1600                             |
| Phen                | 36                              | 3600                             |
| Ant                 | 3.4                             | 340                              |
| Flt                 | 48                              | 4800                             |
| Pyr                 | 18                              | 1800                             |
| BaA                 | 1.9                             | 190                              |
| Chry                | 16                              | 1600                             |
| BbF                 | 7.9                             | 790                              |
| BkF                 | 7.9                             | 790                              |
| BaP                 | 1.6                             | 160                              |
| IndP                | 3.8                             | 380                              |
| DahA                | 1.8                             | 180                              |
| BghiP               | 4.9                             | 490                              |

**Table S3:** Risk classification of individual PAHs and  $\Sigma$ PAHs<sup>2</sup>

| <b>Individual PAHs</b> |                                |                                 | <b><math>\Sigma</math>PAHs</b>            |                                            |
|------------------------|--------------------------------|---------------------------------|-------------------------------------------|--------------------------------------------|
|                        | <b><math>RQ_{(NCs)}</math></b> | <b><math>RQ_{(MPCs)}</math></b> | <b><math>RQ_{\Sigma PAHs(NCs)}</math></b> | <b><math>RQ_{\Sigma PAHs(MPCs)}</math></b> |
| Risk-free              | 0                              |                                 | Risk-free =0                              |                                            |
|                        |                                |                                 | Low-risk $\geq 1; < 800$                  | = 0                                        |
| Moderate-risk          | $\geq 1$                       | $< 1$                           | Moderate risk <sub>1</sub> $\geq 800$     | = 0                                        |
|                        |                                |                                 | Moderate risk <sub>2</sub> $< 800$        | $\geq 1$                                   |
| High-risk              |                                | $\geq 1$                        | High-risk $\geq 800$                      | $\geq 1$                                   |

**Table S4:** Toxicological parameters used for health risk assessment of the investigated PAHs

| PAH  | BaP <sub>TEF</sub> <sup>3</sup> | BaP <sub>MEF</sub> <sup>4</sup> | Oral Ingestion Reference Dose (RfD <sub>ing</sub> ) <sup>5</sup> | Inhalation Reference Dose (RfD <sub>inh</sub> ) <sup>5</sup> | SFO <sub>ing</sub> (mg kg <sup>-1</sup> d <sup>-1</sup> ) <sup>6</sup> | IUR (µg m <sup>-3</sup> ) <sup>7</sup> | GIABS <sup>8</sup> |
|------|---------------------------------|---------------------------------|------------------------------------------------------------------|--------------------------------------------------------------|------------------------------------------------------------------------|----------------------------------------|--------------------|
| Nap  |                                 |                                 | 2 × 10 <sup>-2</sup>                                             | 8.57 × 10 <sup>-4</sup>                                      | 1.2 × 10 <sup>-1</sup> *                                               | 3.4 × 10 <sup>-5</sup> *               | 1                  |
| Acy  |                                 |                                 | 6 × 10 <sup>-2</sup>                                             | 6 × 10 <sup>-2</sup>                                         |                                                                        |                                        |                    |
| Ace  |                                 |                                 | 6 × 10 <sup>-2</sup>                                             | 6 × 10 <sup>-2</sup>                                         |                                                                        |                                        |                    |
| Flu  |                                 |                                 | 4 × 10 <sup>-2</sup>                                             | 4 × 10 <sup>-2</sup>                                         |                                                                        |                                        |                    |
| Phen |                                 |                                 | 3 × 10 <sup>-2</sup>                                             | 3 × 10 <sup>-2</sup>                                         |                                                                        |                                        |                    |
| Ant  |                                 |                                 | 3 × 10 <sup>-1</sup>                                             | 3 × 10 <sup>-1</sup>                                         |                                                                        |                                        |                    |
| Flt  |                                 |                                 | 4 × 10 <sup>-2</sup>                                             | 4 × 10 <sup>-2</sup>                                         |                                                                        |                                        |                    |
| Pyr  |                                 |                                 | 3 × 10 <sup>-1</sup>                                             | 3 × 10 <sup>-1</sup>                                         |                                                                        |                                        |                    |
| BaA  | 0.1                             | 0.082                           |                                                                  |                                                              | 7.3 × 10 <sup>-1</sup>                                                 | 1.1 × 10 <sup>-4</sup>                 | 1                  |
| Chry | 0.001                           | 0.017                           |                                                                  |                                                              | 7.3 × 10 <sup>-3</sup>                                                 | 1.1 × 10 <sup>-5</sup>                 | 1                  |
| BbF  | 0.1                             | 0.25                            |                                                                  |                                                              | 7.3 × 10 <sup>-1</sup>                                                 | 1.1 × 10 <sup>-4</sup>                 | 1                  |
| BkF  | 0.01                            | 0.11                            |                                                                  |                                                              | 7.3 × 10 <sup>-2</sup>                                                 | 1.1 × 10 <sup>-4</sup>                 | 1                  |
| BaP  | 1                               | 1                               |                                                                  |                                                              | 7.3                                                                    | 1.1 × 10 <sup>-3</sup>                 | 1                  |
| IndP | 0.1                             | 0.31                            |                                                                  |                                                              | 7.3 × 10 <sup>-1</sup>                                                 | 1.1 × 10 <sup>-4</sup>                 | 1                  |
| DahA | 1                               | 0.29                            |                                                                  |                                                              | 7.3                                                                    | 1.2 × 10 <sup>-3</sup>                 | 1                  |

\*California Office of Environmental Health Hazard and Assessment (OEHHA)  
(<https://oehha.ca.gov/chemicals>)

**Table S5:** Values of variables for estimation of human health risk assessment

| Parameters       | Unit                            | Definition                                   | Values                       |                   |
|------------------|---------------------------------|----------------------------------------------|------------------------------|-------------------|
|                  |                                 |                                              | Child                        | Adult             |
| C                | $\mu\text{g kg}^{-1}$           | Concentrations of PAHs in the matrices       |                              |                   |
| ABS <sub>d</sub> | -                               | Dermal absorption factor for PAHs            | 0.13 <sup>8</sup>            | 0.13 <sup>8</sup> |
| AF               | $\text{mg cm}^{-2}$             | Soil/dust to skin adherence factor           | 0.2 <sup>8</sup>             | 0.07 <sup>8</sup> |
| BW               | kg                              | Average body weight                          | 15 <sup>9</sup>              | 80 <sup>9</sup>   |
| ED               | year                            | Exposure duration                            | 6 <sup>9</sup>               | 20 <sup>9</sup>   |
| EF               | $\text{d yr}^{-1}$              | Exposure frequency                           | 350 <sup>10</sup>            | 350 <sup>10</sup> |
| ET               | $\text{h d}^{-1}$               | Exposure time                                | 24 <sup>11</sup>             | 24 <sup>11</sup>  |
| IngR             | $\text{mg d}^{-1}$              | Dust ingestion rate for receptor             | 200 <sup>6</sup>             | 100 <sup>6</sup>  |
| InhR             | $\text{m}^3 \text{d}^{-1}$      | Inhalation rate                              | 30 <sup>6</sup>              | 60 <sup>6</sup>   |
| SA               | $\text{cm}^2 \text{event}^{-1}$ | Skin surface area                            | 2800 <sup>6</sup>            | 5700 <sup>6</sup> |
| AT <sub>nc</sub> | d                               | Averaging time for non-carcinogenic effects  | ED $\times$ 365 <sup>6</sup> |                   |
| AT <sub>ca</sub> | d                               | Averaging time for carcinogenic effects      | LT $\times$ 365 <sup>6</sup> |                   |
| LT               | year                            | Lifetime                                     | 55 years <sup>12</sup>       |                   |
| PEF              | $\text{m}^3 \text{kg}^{-1}$     | Soil/dust to air particulate emission factor | $1.36 \times 10^{96}$        |                   |

**Table S6:** PAH concentrations ( $\mu\text{g kg}^{-1}$ ) in indoor dust of Port Harcourt

|                   | ID1        | ID2         | ID3         | ID4         | ID5         | ID6         | ID7         | ID8         | ID9        | ID10       | ID11       | ID12       | ID13       | ID14        | ID15       | ID16        | ID17        | ID18        | ID19        | ID20        |
|-------------------|------------|-------------|-------------|-------------|-------------|-------------|-------------|-------------|------------|------------|------------|------------|------------|-------------|------------|-------------|-------------|-------------|-------------|-------------|
| Nap               | 80         | 106         | 42          | 1008        | 130         | 1214        | 124         | 1010        | 168        | 82         | 58         | 36         | 60         | 168         | 44         | 1638        | 72          | 218         | 78          | 138         |
| 2-MNap            | 44         | 32          | 104         | 100         | 98          | 214         | 98          | 146         | 170        | 80         | 8          | 44         | 162        | 652         | 26         | 610         | 1782        | 70          | 72          | 56          |
| Acy               | 38         | 42          | 796         | 332         | 268         | 748         | 78          | 238         | 66         | 60         | 50         | 28         | 162        | 186         | 28         | 518         | 128         | 78          | 62          | 72          |
| Ace               | 24         | 22          | 1126        | 310         | 118         | 618         | 118         | 74          | 26         | 44         | 22         | 10         | 202        | 718         | 12         | 1368        | 72          | 54          | 88          | 64          |
| Flu               | 24         | 30          | 812         | 128         | 134         | 618         | 66          | 104         | 62         | 42         | 16         | 10         | 202        | 118         | 14         | 838         | 84          | 76          | 38          | 84          |
| Phen              | 28         | 30          | 64          | 260         | 58          | 96          | 82          | 60          | 36         | 80         | 22         | 6          | 0          | 556         | 20         | 342         | 70          | 98          | 64          | 50          |
| Ant               | 20         | 16          | 352         | 360         | 174         | 582         | 108         | 316         | 40         | 22         | 18         | 6          | 46         | 36          | 26         | 502         | 64          | 112         | 76          | 48          |
| Flt               | 16         | 20          | 1050        | 108         | 166         | 146         | 62          | 38          | 16         | 10         | 18         | 4          | 0          | 470         | 10         | 34          | 66          | 80          | 38          | 66          |
| Pyr               | 16         | 16          | 250         | 130         | 38          | 126         | 74          | 26          | 40         | 12         | 16         | 2          | 0          | 446         | 14         | 150         | 98          | 98          | 30          | 38          |
| BaA               | 10         | 18          | 712         | 46          | 66          | 76          | 48          | 30          | 14         | 16         | 10         | 2          | 0          | 312         | 28         | 152         | 92          | 46          | 66          | 52          |
| Chry              | 8          | 20          | 936         | 56          | 28          | 38          | 114         | 50          | 24         | 10         | 8          | 2          | 44         | 428         | 10         | 108         | 140         | 68          | 36          | 84          |
| BbF               | 12         | 22          | 118         | 108         | 40          | 46          | 84          | 28          | 40         | 18         | 6          | 2          | 0          | 50          | 32         | 76          | 30          | 62          | 72          | 42          |
| BkF               | 14         | 52          | 114         | 60          | 102         | 48          | 242         | 38          | 30         | 12         | 14         | 4          | 48         | 390         | 26         | 90          | 80          | 88          | 42          | 60          |
| BaP               | 12         | 46          | 34          | 74          | 50          | 68          | 998         | 60          | 124        | 18         | 28         | 10         | 48         | 1338        | 32         | 308         | 78          | 72          | 52          | 40          |
| DahA              | 22         | 76          | 28          | 110         | 96          | 54          | 352         | 88          | 34         | 30         | 10         | 30         | 0          | 442         | 108        | 836         | 118         | 148         | 74          | 58          |
| IndP              | 14         | 104         | 42          | 112         | 96          | 92          | 1166        | 48          | 52         | 22         | 14         | 70         | 0          | 122         | 38         | 1410        | 60          | 106         | 48          | 26          |
| BghiP             | 22         | 998         | 68          | 140         | 262         | 118         | 520         | 90          | 38         | 36         | 32         | 10         | 0          | 132         | 50         | 148         | 30          | 72          | 98          | 48          |
| <b>Total</b>      | <b>404</b> | <b>1650</b> | <b>6648</b> | <b>3442</b> | <b>1924</b> | <b>4902</b> | <b>4334</b> | <b>2444</b> | <b>980</b> | <b>594</b> | <b>350</b> | <b>276</b> | <b>974</b> | <b>6564</b> | <b>518</b> | <b>9128</b> | <b>3064</b> | <b>1546</b> | <b>1034</b> | <b>1026</b> |
| 2-ring PAHs       | 124        | 138         | 146         | 1108        | 228         | 1428        | 222         | 1156        | 338        | 162        | 66         | 80         | 222        | 820         | 70         | 2248        | 1854        | 288         | 150         | 194         |
| 3-ring PAHs       | 134        | 140         | 3150        | 1390        | 752         | 2662        | 452         | 792         | 230        | 248        | 128        | 60         | 612        | 1614        | 100        | 3568        | 418         | 418         | 328         | 318         |
| 4-ring PAHs       | 50         | 74          | 2948        | 340         | 298         | 386         | 298         | 144         | 94         | 48         | 52         | 10         | 44         | 1656        | 62         | 444         | 396         | 292         | 170         | 240         |
| 5-ring PAHs       | 60         | 196         | 294         | 352         | 288         | 216         | 1676        | 214         | 228        | 78         | 58         | 46         | 96         | 2220        | 198        | 1310        | 306         | 370         | 240         | 200         |
| 6-ring PAHs       | 36         | 1102        | 110         | 252         | 358         | 210         | 1686        | 138         | 90         | 58         | 46         | 80         | 0          | 254         | 88         | 1558        | 90          | 178         | 146         | 74          |
| PAH <sub>7C</sub> | 92         | 338         | 1984        | 566         | 478         | 422         | 3004        | 342         | 318        | 126        | 90         | 120        | 140        | 3082        | 274        | 2980        | 598         | 590         | 390         | 362         |

**Table S7:** PAH concentrations ( $\mu\text{g kg}^{-1}$ ) in outdoor dust of Port Harcourt

|                   | OD1         | OD2       | OD3        | OD4       | OD5         | OD6        | OD7          | OD8         | OD9         | OD10        | OD11       | OD12      | OD13       | OD14      | OD15       | OD16       | OD17        | OD18       | OD19        | OD20       |
|-------------------|-------------|-----------|------------|-----------|-------------|------------|--------------|-------------|-------------|-------------|------------|-----------|------------|-----------|------------|------------|-------------|------------|-------------|------------|
| Nap               | 186         | 10        | 36         | 2         | 746         | 56         | 466          | 698         | 282         | 296         | 24         | 20        | 28         | 12        | 34         | 522        | 4208        | 12         | 114         | 52         |
| 2-MNap            | 52          | 4         | 24         | 8         | 0           | 40         | 492          | 630         | 114         | 1052        | 14         | 4         | 48         | 4         | 24         | 22         | 100         | 10         | 52          | 16         |
| Acy               | 84          | 6         | 26         | 2         | 0           | 42         | 1306         | 630         | 724         | 454         | 10         | 4         | 38         | 2         | 24         | 74         | 332         | 8          | 180         | 20         |
| Ace               | 50          | 4         | 74         | 4         | 402         | 38         | 954          | 416         | 88          | 270         | 12         | 4         | 50         | 2         | 8          | 62         | 310         | 12         | 142         | 12         |
| Flu               | 136         | 6         | 34         | 10        | 402         | 38         | 462          | 416         | 332         | 270         | 8          | 4         | 28         | 2         | 8          | 62         | 128         | 6          | 146         | 16         |
| Phen              | 204         | 6         | 18         | 2         | 0           | 38         | 400          | 446         | 126         | 326         | 26         | 2         | 8          | 0         | 4          | 10         | 260         | 8          | 180         | 14         |
| Ant               | 134         | 2         | 34         | 4         | 0           | 38         | 990          | 440         | 52          | 582         | 8          | 2         | 34         | 0         | 6          | 58         | 360         | 10         | 274         | 8          |
| Flt               | 218         | 4         | 6          | 2         | 0           | 0          | 542          | 0           | 274         | 426         | 4          | 2         | 6          | 0         | 6          | 14         | 108         | 6          | 118         | 10         |
| Pyr               | 82          | 4         | 8          | 0         | 0           | 0          | 958          | 0           | 44          | 166         | 2          | 2         | 6          | 2         | 4          | 12         | 130         | 8          | 166         | 8          |
| BaA               | 94          | 2         | 10         | 0         | 0           | 0          | 1034         | 0           | 78          | 254         | 10         | 0         | 8          | 0         | 2          | 8          | 46          | 4          | 154         | 10         |
| Chry              | 356         | 4         | 6          | 2         | 0           | 0          | 674          | 0           | 50          | 110         | 2          | 2         | 16         | 4         | 2          | 4          | 56          | 12         | 320         | 10         |
| BbF               | 138         | 2         | 18         | 2         | 0           | 0          | 434          | 0           | 52          | 126         | 6          | 2         | 6          | 2         | 6          | 4          | 108         | 8          | 212         | 12         |
| BkF               | 414         | 8         | 28         | 2         | 0           | 0          | 1502         | 370         | 46          | 260         | 10         | 6         | 16         | 0         | 14         | 4          | 60          | 24         | 366         | 26         |
| BaP               | 154         | 6         | 52         | 2         | 414         | 0          | 802          | 370         | 48          | 326         | 12         | 12        | 50         | 2         | 16         | 6          | 74          | 100        | 290         | 22         |
| DahA              | 352         | 8         | 44         | 8         | 374         | 0          | 680          | 512         | 40          | 236         | 64         | 10        | 32         | 4         | 22         | 6          | 110         | 36         | 1218        | 38         |
| IndP              | 244         | 8         | 40         | 4         | 374         | 0          | 684          | 512         | 50          | 404         | 24         | 10        | 42         | 2         | 22         | 10         | 112         | 116        | 270         | 52         |
| BghiP             | 316         | 6         | 40         | 4         | 386         | 60         | 788          | 510         | 40          | 648         | 20         | 10        | 64         | 6         | 38         | 12         | 140         | 52         | 584         | 498        |
| <b>Total</b>      | <b>3214</b> | <b>90</b> | <b>498</b> | <b>58</b> | <b>3098</b> | <b>350</b> | <b>13168</b> | <b>5950</b> | <b>2440</b> | <b>6206</b> | <b>256</b> | <b>96</b> | <b>480</b> | <b>44</b> | <b>240</b> | <b>890</b> | <b>6642</b> | <b>432</b> | <b>4786</b> | <b>824</b> |
| 2-ring PAHs       | 238         | 14        | 60         | 10        | 746         | 96         | 958          | 1328        | 396         | 1348        | 38         | 24        | 76         | 16        | 58         | 544        | 4308        | 22         | 166         | 68         |
| 3-ring PAHs       | 608         | 24        | 186        | 22        | 804         | 194        | 4112         | 2348        | 1322        | 1902        | 64         | 16        | 158        | 6         | 50         | 266        | 1390        | 44         | 922         | 70         |
| 4-ring PAHs       | 750         | 14        | 30         | 4         | 0           | 0          | 3208         | 0           | 446         | 956         | 18         | 6         | 36         | 6         | 14         | 38         | 340         | 30         | 758         | 38         |
| 5-ring PAHs       | 1058        | 24        | 142        | 14        | 788         | 0          | 3418         | 1252        | 186         | 948         | 92         | 30        | 104        | 8         | 58         | 20         | 352         | 168        | 2086        | 98         |
| 6-ring PAHs       | 560         | 14        | 80         | 8         | 760         | 60         | 1472         | 1022        | 90          | 1052        | 44         | 20        | 106        | 8         | 60         | 22         | 252         | 168        | 854         | 550        |
| PAH <sub>7C</sub> | 1752        | 38        | 198        | 20        | 1162        | 0          | 5810         | 1764        | 364         | 1716        | 128        | 42        | 170        | 14        | 84         | 42         | 566         | 300        | 2830        | 170        |

**Table S8:** PAH concentrations ( $\mu\text{g kg}^{-1}$ ) in soils of Port Harcourt

|                   | S1          | S2           | S3          | S4          | S5          | S6          | S7          | S8           | S9           | S10         | S11          | S12          | S13          | S14         | S15          | S16          | S17          | S18          | S19        | S20          |
|-------------------|-------------|--------------|-------------|-------------|-------------|-------------|-------------|--------------|--------------|-------------|--------------|--------------|--------------|-------------|--------------|--------------|--------------|--------------|------------|--------------|
| Nap               | 4208        | 1112         | 654         | 0           | 130         | 0           | 0           | 3512         | 1964         | 0           | 990          | 742          | 5430         | 108         | 1956         | 88           | 456          | 928          | 102        | 2828         |
| 2-MNap            | 100         | 840          | 204         | 0           | 98          | 0           | 0           | 912          | 2552         | 0           | 1632         | 934          | 1966         | 58          | 1008         | 428          | 1910         | 490          | 14         | 234          |
| Acy               | 332         | 1142         | 240         | 0           | 268         | 0           | 0           | 312          | 386          | 0           | 3552         | 794          | 166          | 138         | 5270         | 1146         | 1246         | 924          | 24         | 462          |
| Ace               | 310         | 996          | 46          | 0           | 118         | 0           | 0           | 358          | 468          | 0           | 1000         | 582          | 1438         | 60          | 610          | 1230         | 1024         | 606          | 8          | 390          |
| Flu               | 128         | 1042         | 694         | 0           | 134         | 0           | 0           | 344          | 4472         | 0           | 1006         | 596          | 66           | 120         | 880          | 590          | 1510         | 504          | 10         | 1206         |
| Phen              | 260         | 938          | 756         | 0           | 58          | 0           | 0           | 876          | 4372         | 0           | 1554         | 2006         | 1084         | 40          | 538          | 572          | 898          | 306          | 6          | 1058         |
| Ant               | 360         | 718          | 34          | 0           | 174         | 0           | 0           | 1882         | 1636         | 0           | 716          | 652          | 410          | 56          | 582          | 740          | 458          | 394          | 32         | 1904         |
| Flt               | 108         | 458          | 1488        | 0           | 166         | 0           | 0           | 640          | 4144         | 0           | 1220         | 1810         | 1266         | 36          | 490          | 254          | 772          | 322          | 4          | 1454         |
| Pyr               | 130         | 294          | 50          | 0           | 38          | 0           | 0           | 1376         | 1550         | 0           | 854          | 1198         | 2136         | 38          | 218          | 586          | 564          | 140          | 2          | 800          |
| BaA               | 46          | 564          | 276         | 0           | 66          | 0           | 0           | 988          | 1466         | 0           | 1372         | 830          | 1368         | 30          | 502          | 2600         | 260          | 378          | 2          | 104          |
| Chry              | 56          | 348          | 422         | 670         | 28          | 142         | 480         | 350          | 254          | 882         | 592          | 1820         | 5032         | 62          | 1070         | 270          | 428          | 264          | 4          | 672          |
| BbF               | 108         | 566          | 196         | 1058        | 40          | 1044        | 352         | 210          | 2370         | 276         | 1092         | 1050         | 2218         | 154         | 644          | 1396         | 478          | 1088         | 2          | 470          |
| BkF               | 60          | 504          | 348         | 618         | 102         | 44          | 636         | 154          | 396          | 732         | 2566         | 2530         | 4544         | 206         | 760          | 6156         | 1282         | 650          | 4          | 856          |
| BaP               | 74          | 548          | 340         | 1650        | 50          | 1488        | 870         | 1548         | 202          | 352         | 636          | 1030         | 2348         | 216         | 1150         | 1478         | 1222         | 670          | 6          | 128          |
| DahA              | 110         | 658          | 242         | 926         | 96          | 794         | 496         | 236          | 92           | 720         | 896          | 4478         | 3822         | 272         | 2132         | 404          | 1348         | 1084         | 8          | 82           |
| IndP              | 112         | 2692         | 298         | 1202        | 96          | 1794        | 1142        | 236          | 138          | 470         | 1058         | 5330         | 1460         | 256         | 1692         | 132          | 1348         | 1526         | 4          | 252          |
| BghiP             | 140         | 1728         | 536         | 880         | 262         | 390         | 612         | 1382         | 180          | 526         | 750          | 3830         | 3604         | 476         | 1012         | 144          | 2710         | 2970         | 8          | 158          |
| <b>Total</b>      | <b>6642</b> | <b>15148</b> | <b>6824</b> | <b>7004</b> | <b>1924</b> | <b>5696</b> | <b>4588</b> | <b>15316</b> | <b>26642</b> | <b>3958</b> | <b>21486</b> | <b>30212</b> | <b>38358</b> | <b>2326</b> | <b>20514</b> | <b>18214</b> | <b>17914</b> | <b>13244</b> | <b>240</b> | <b>13058</b> |
| 2-ring PAHs       | 4308        | 1952         | 858         | 0           | 228         | 0           | 0           | 4424         | 4516         | 0           | 2622         | 1676         | 7396         | 166         | 2964         | 516          | 2366         | 1418         | 116        | 3062         |
| 3-ring PAHs       | 1390        | 4836         | 1770        | 0           | 752         | 0           | 0           | 3772         | 11334        | 0           | 7828         | 4630         | 3164         | 414         | 7880         | 4278         | 5136         | 2734         | 80         | 5020         |
| 4-ring PAHs       | 340         | 1664         | 2236        | 670         | 298         | 142         | 480         | 3354         | 7414         | 882         | 4038         | 5658         | 9802         | 166         | 2280         | 3710         | 2024         | 1104         | 12         | 3030         |
| 5-ring PAHs       | 352         | 2276         | 1126        | 4252        | 288         | 3370        | 2354        | 2148         | 3060         | 2080        | 5190         | 9088         | 12932        | 848         | 4686         | 9434         | 4330         | 3492         | 20         | 1536         |
| 6-ring PAHs       | 252         | 4420         | 834         | 2082        | 358         | 2184        | 1754        | 1618         | 318          | 996         | 1808         | 9160         | 5064         | 732         | 2704         | 276          | 4058         | 4496         | 12         | 410          |
| PAH <sub>7C</sub> | 566         | 5880         | 2122        | 6124        | 478         | 5306        | 3976        | 3722         | 4918         | 3432        | 8212         | 17068        | 20792        | 1196        | 7950         | 12436        | 6366         | 5660         | 30         | 2564         |



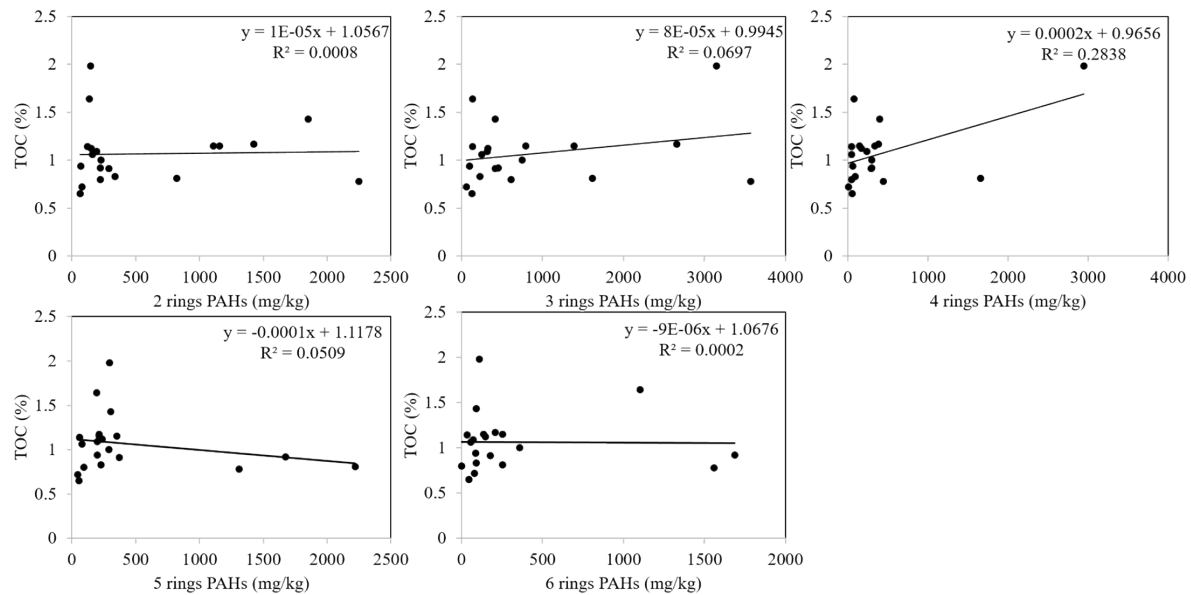

**Figure S1:** Regression plots between TOC and PAH fractions in indoor dust from Port Harcourt City, Nigeria

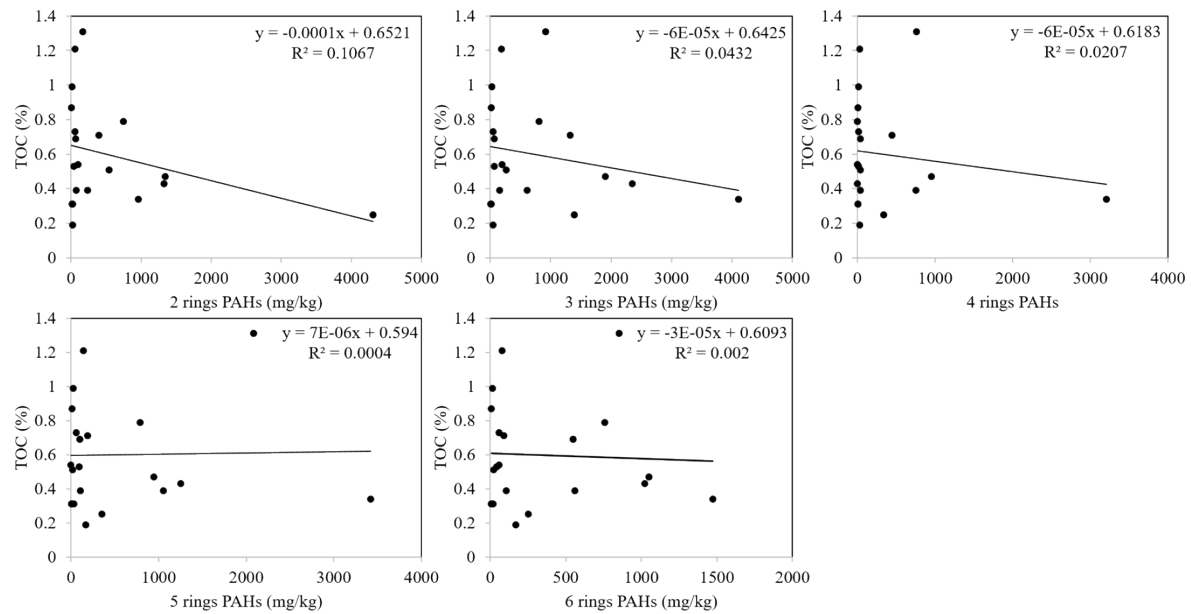

**Figure S2:** Regression plots between TOC and PAH fractions in outdoor dust from Port Harcourt City, Nigeria

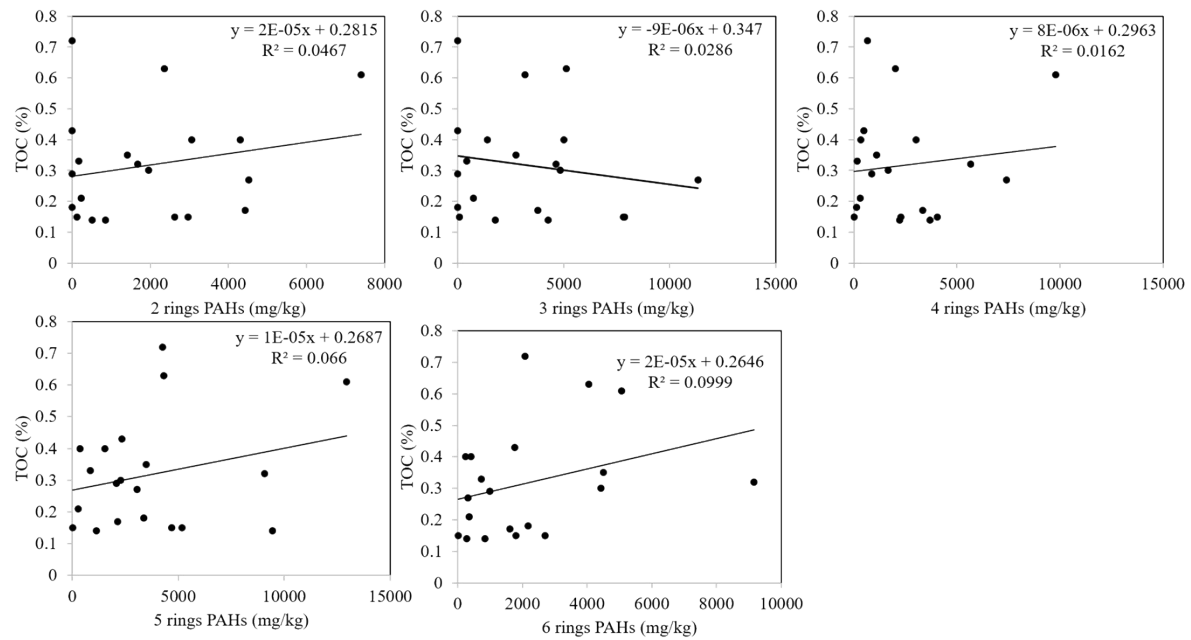

**Figure S3:** Regression plots between TOC and PAH fractions in soils from Port Harcourt City, Nigeria

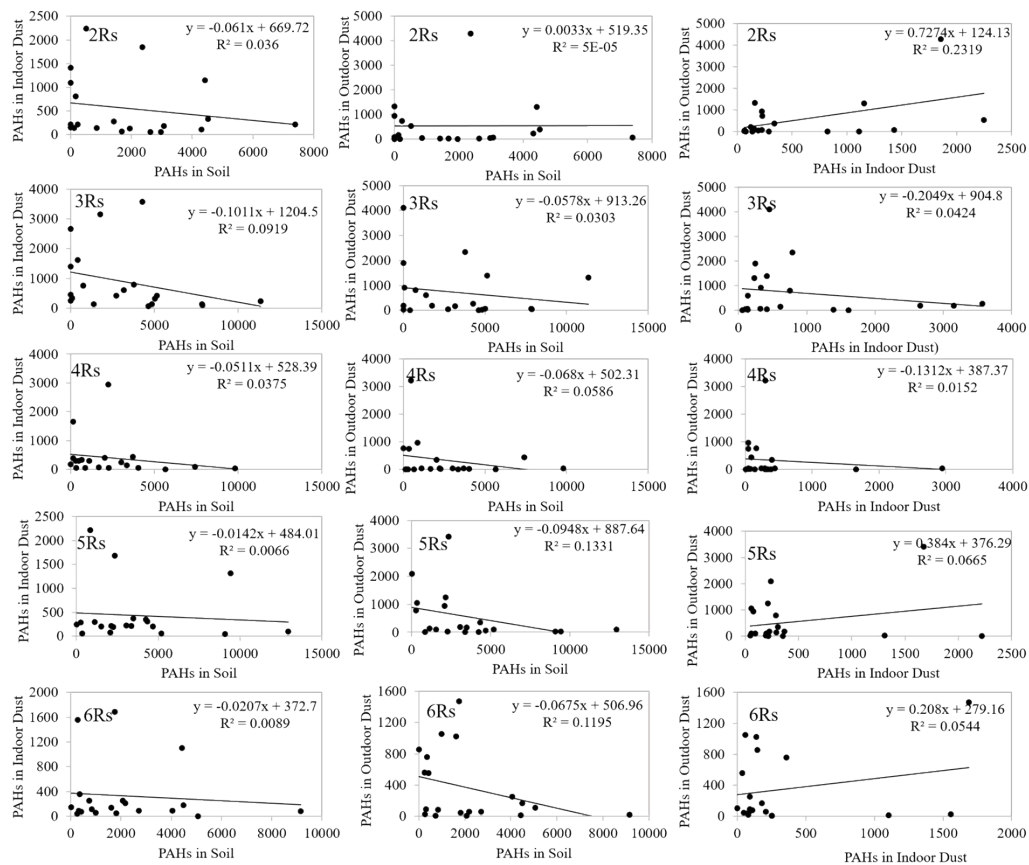

**Figure S4:** Regression plots of PAH ring fractions (Rs) ( $\text{mg kg}^{-1}$ ) in different environmental matrices (soils, indoor dust and outdoor dust) from Port Harcourt City, Nigeria

**Table S9:**  $\sum RQ_{(NCs)}$  for indoor dust, outdoor dust and soils from Port Harcourt

| Matrix       | Code | Nap | Acy | Ace | Flu | Phen | Ant | Flt | Pyr | BaA | Chry | BbF | BkF | BaP | DahA | IndP | BghiP | $\sum RQ_{(NCs)}$ |
|--------------|------|-----|-----|-----|-----|------|-----|-----|-----|-----|------|-----|-----|-----|------|------|-------|-------------------|
| Indoor dust  | ID1  | 12  | 22  | 4   | 2   | 1    | 6   | 0   | 1   | 5   | 1    | 2   | 2   | 8   | 12   | 4    | 4     | 84                |
|              | ID2  | 15  | 25  | 3   | 2   | 1    | 5   | 0   | 1   | 9   | 1    | 3   | 7   | 29  | 42   | 27   | 204   | 374               |
|              | ID3  | 6   | 468 | 166 | 51  | 2    | 104 | 22  | 14  | 375 | 59   | 15  | 14  | 21  | 16   | 11   | 14    | 1356              |
|              | ID4  | 146 | 195 | 46  | 8   | 7    | 106 | 2   | 7   | 24  | 4    | 14  | 8   | 46  | 61   | 29   | 29    | 732               |
|              | ID5  | 19  | 158 | 17  | 8   | 2    | 51  | 3   | 2   | 35  | 2    | 5   | 13  | 31  | 53   | 25   | 53    | 478               |
|              | ID6  | 176 | 440 | 91  | 39  | 3    | 171 | 3   | 7   | 40  | 2    | 6   | 6   | 43  | 30   | 24   | 24    | 1104              |
|              | ID7  | 18  | 46  | 17  | 4   | 2    | 32  | 1   | 4   | 25  | 7    | 11  | 31  | 624 | 196  | 307  | 106   | 1431              |
|              | ID8  | 146 | 140 | 11  | 7   | 2    | 93  | 1   | 1   | 16  | 3    | 4   | 5   | 38  | 49   | 13   | 18    | 545               |
|              | ID9  | 24  | 39  | 4   | 4   | 1    | 12  | 0   | 2   | 7   | 2    | 5   | 4   | 78  | 19   | 14   | 8     | 222               |
|              | ID10 | 12  | 35  | 6   | 3   | 2    | 6   | 0   | 1   | 8   | 1    | 2   | 2   | 11  | 17   | 6    | 7     | 120               |
|              | ID11 | 8   | 29  | 3   | 1   | 1    | 5   | 0   | 1   | 5   | 1    | 1   | 2   | 18  | 6    | 4    | 7     | 91                |
|              | ID12 | 5   | 16  | 1   | 1   | 0    | 2   | 0   | 0   | 1   | 0    | 0   | 1   | 6   | 17   | 18   | 2     | 71                |
|              | ID13 | 9   | 95  | 30  | 13  | 0    | 14  | 0   | 0   | 0   | 3    | 0   | 6   | 30  | 0    | 0    | 0     | 199               |
|              | ID14 | 24  | 109 | 106 | 7   | 15   | 11  | 10  | 25  | 164 | 27   | 6   | 49  | 836 | 246  | 32   | 27    | 1695              |
|              | ID15 | 6   | 16  | 2   | 1   | 1    | 8   | 0   | 1   | 15  | 1    | 4   | 3   | 20  | 60   | 10   | 10    | 158               |
|              | ID16 | 237 | 305 | 201 | 52  | 10   | 148 | 1   | 8   | 80  | 7    | 10  | 11  | 193 | 464  | 371  | 30    | 2128              |
|              | ID17 | 10  | 75  | 11  | 5   | 2    | 19  | 1   | 5   | 48  | 9    | 4   | 10  | 49  | 66   | 16   | 6     | 336               |
|              | ID18 | 32  | 46  | 8   | 5   | 3    | 33  | 2   | 5   | 24  | 4    | 8   | 11  | 45  | 82   | 28   | 15    | 350               |
|              | ID19 | 11  | 36  | 13  | 2   | 2    | 22  | 1   | 2   | 35  | 2    | 9   | 5   | 33  | 41   | 13   | 20    | 247               |
|              | ID20 | 20  | 42  | 9   | 5   | 1    | 14  | 1   | 2   | 27  | 5    | 5   | 8   | 25  | 32   | 7    | 10    | 215               |
| Outdoor dust | OD1  | 27  | 49  | 7   | 9   | 6    | 39  | 5   | 5   | 49  | 22   | 17  | 52  | 96  | 196  | 64   | 64    | 708               |
|              | OD2  | 1   | 4   | 1   | 0   | 0    | 1   | 0   | 0   | 1   | 0    | 0   | 1   | 4   | 4    | 2    | 1     | 21                |
|              | OD3  | 5   | 15  | 11  | 2   | 1    | 10  | 0   | 0   | 5   | 0    | 2   | 4   | 33  | 24   | 11   | 8     | 132               |
|              | OD4  | 0   | 1   | 1   | 1   | 0    | 1   | 0   | 0   | 0   | 0    | 0   | 0   | 1   | 4    | 1    | 1     | 12                |
|              | OD5  | 108 | 0   | 59  | 25  | 0    | 0   | 0   | 0   | 0   | 0    | 0   | 0   | 259 | 208  | 98   | 79    | 836               |
|              | OD6  | 8   | 25  | 6   | 2   | 1    | 11  | 0   | 0   | 0   | 0    | 0   | 0   | 0   | 0    | 0    | 12    | 65                |
|              | OD7  | 68  | 768 | 140 | 29  | 11   | 291 | 11  | 53  | 544 | 42   | 55  | 190 | 501 | 378  | 180  | 161   | 3423              |
|              | OD8  | 101 | 371 | 61  | 26  | 12   | 129 | 0   | 0   | 0   | 0    | 0   | 47  | 231 | 284  | 135  | 104   | 1502              |
|              | OD9  | 41  | 426 | 13  | 21  | 4    | 15  | 6   | 2   | 41  | 3    | 7   | 6   | 30  | 22   | 13   | 8     | 658               |
|              | OD10 | 43  | 267 | 40  | 17  | 9    | 171 | 9   | 9   | 134 | 7    | 16  | 33  | 204 | 131  | 106  | 132   | 1328              |
|              | OD11 | 3   | 6   | 2   | 1   | 1    | 2   | 0   | 0   | 5   | 0    | 1   | 1   | 8   | 36   | 6    | 4     | 76                |
|              | OD12 | 3   | 2   | 1   | 0   | 0    | 1   | 0   | 0   | 0   | 0    | 0   | 1   | 8   | 6    | 3    | 2     | 26                |
|              | OD13 | 4   | 22  | 7   | 2   | 0    | 10  | 0   | 0   | 4   | 1    | 1   | 2   | 31  | 18   | 11   | 13    | 127               |
|              | OD14 | 2   | 1   | 0   | 0   | 0    | 0   | 0   | 0   | 0   | 0    | 0   | 0   | 1   | 2    | 1    | 1     | 9                 |
|              | OD15 | 5   | 14  | 1   | 1   | 0    | 2   | 0   | 0   | 1   | 0    | 1   | 2   | 10  | 12   | 6    | 8     | 62                |
|              | OD16 | 76  | 44  | 9   | 4   | 0    | 17  | 0   | 1   | 4   | 0    | 1   | 1   | 4   | 3    | 3    | 2     | 168               |

|      |      |     |      |     |     |     |     |    |     |      |     |     |     |      |      |      |      |      |
|------|------|-----|------|-----|-----|-----|-----|----|-----|------|-----|-----|-----|------|------|------|------|------|
| Soil | OD17 | 610 | 195  | 46  | 8   | 7   | 106 | 2  | 7   | 24   | 4   | 14  | 8   | 46   | 61   | 29   | 29   | 1196 |
|      | OD18 | 2   | 5    | 2   | 0   | 0   | 3   | 0  | 0   | 2    | 1   | 1   | 3   | 63   | 20   | 31   | 11   | 143  |
|      | OD19 | 17  | 106  | 21  | 9   | 5   | 81  | 2  | 9   | 81   | 20  | 27  | 46  | 181  | 677  | 71   | 119  | 1472 |
|      | OD20 | 8   | 12   | 2   | 1   | 0   | 2   | 0  | 0   | 5    | 1   | 2   | 3   | 14   | 21   | 14   | 102  | 186  |
|      | S1   | 610 | 195  | 46  | 8   | 7   | 106 | 2  | 7   | 24   | 4   | 14  | 8   | 46   | 61   | 29   | 29   | 1196 |
|      | S2   | 161 | 672  | 146 | 65  | 26  | 211 | 10 | 16  | 297  | 22  | 72  | 64  | 343  | 366  | 708  | 353  | 3531 |
|      | S3   | 95  | 141  | 7   | 43  | 21  | 10  | 31 | 3   | 145  | 26  | 25  | 44  | 213  | 134  | 78   | 109  | 1126 |
|      | S4   | 0   | 0    | 0   | 0   | 0   | 0   | 0  | 0   | 0    | 42  | 134 | 78  | 1031 | 514  | 316  | 180  | 2296 |
|      | S5   | 19  | 158  | 17  | 8   | 2   | 51  | 3  | 2   | 35   | 2   | 5   | 13  | 31   | 53   | 25   | 53   | 478  |
|      | S6   | 0   | 0    | 0   | 0   | 0   | 0   | 0  | 0   | 0    | 9   | 132 | 6   | 930  | 441  | 472  | 80   | 2069 |
|      | S7   | 0   | 0    | 0   | 0   | 0   | 0   | 0  | 0   | 0    | 30  | 45  | 81  | 544  | 276  | 301  | 125  | 1400 |
|      | S8   | 509 | 184  | 53  | 22  | 24  | 554 | 13 | 76  | 520  | 22  | 27  | 19  | 968  | 131  | 62   | 282  | 3465 |
|      | S9   | 285 | 227  | 69  | 280 | 121 | 481 | 86 | 86  | 772  | 16  | 300 | 50  | 126  | 51   | 36   | 37   | 3023 |
|      | S10  | 0   | 0    | 0   | 0   | 0   | 0   | 0  | 0   | 0    | 55  | 35  | 93  | 220  | 400  | 124  | 107  | 1034 |
|      | S11  | 143 | 2089 | 147 | 63  | 43  | 211 | 25 | 47  | 722  | 37  | 138 | 325 | 398  | 498  | 278  | 153  | 5318 |
|      | S12  | 108 | 467  | 86  | 37  | 56  | 192 | 38 | 67  | 437  | 114 | 133 | 320 | 644  | 2488 | 1403 | 782  | 7369 |
|      | S13  | 787 | 98   | 211 | 4   | 30  | 121 | 26 | 119 | 720  | 315 | 281 | 575 | 1468 | 2123 | 384  | 736  | 7997 |
|      | S14  | 16  | 81   | 9   | 8   | 1   | 16  | 1  | 2   | 16   | 4   | 19  | 26  | 135  | 151  | 67   | 97   | 649  |
|      | S15  | 283 | 3100 | 90  | 55  | 15  | 171 | 10 | 12  | 264  | 67  | 82  | 96  | 719  | 1184 | 445  | 207  | 6800 |
|      | S16  | 13  | 674  | 181 | 37  | 16  | 218 | 5  | 33  | 1368 | 17  | 177 | 779 | 924  | 224  | 35   | 29   | 4730 |
| S17  | 66   | 733 | 151  | 94  | 25  | 135 | 16  | 31 | 137 | 27   | 61  | 162 | 764 | 749  | 355  | 553  | 4058 |      |
| S18  | 134  | 544 | 89   | 32  | 9   | 116 | 7   | 8  | 199 | 17   | 138 | 82  | 419 | 602  | 402  | 606  | 3402 |      |
| S19  | 15   | 14  | 1    | 1   | 0   | 9   | 0   | 0  | 1   | 0    | 0   | 1   | 4   | 4    | 1    | 2    | 53   |      |
| S20  | 410  | 272 | 57   | 75  | 29  | 560 | 30  | 44 | 55  | 42   | 59  | 108 | 80  | 46   | 66   | 32   | 1967 |      |

**Table S10:**  $\Sigma RQ_{(MPCs)}$  for indoor dust, outdoor dust and soils from Port Harcourt

| Matrix       | Code | Nap | Acy | Ace | Flu | Phen | Ant | Flt | Pyr | BaA | Chry | BbF | BkF | BaP | DahA | IndP | BghiP | $\Sigma RQ_{(MPCs)}$ |
|--------------|------|-----|-----|-----|-----|------|-----|-----|-----|-----|------|-----|-----|-----|------|------|-------|----------------------|
| Indoor dust  | ID1  | 0.1 | 0.2 | 0.0 | 0.0 | 0.0  | 0.1 | 0.0 | 0.0 | 0.1 | 0.0  | 0.0 | 0.0 | 0.1 | 0.1  | 0.0  | 0.0   |                      |
|              | ID2  | 0.2 | 0.2 | 0.0 | 0.0 | 0.0  | 0.0 | 0.0 | 0.0 | 0.1 | 0.0  | 0.0 | 0.1 | 0.3 | 0.4  | 0.3  | 0.1   |                      |
|              | ID3  | 0.1 | 4.7 | 1.7 | 0.5 | 0.0  | 1.0 | 0.2 | 0.1 | 3.7 | 0.6  | 0.1 | 0.1 | 0.2 | 0.2  | 0.1  | 0.0   | 11.1                 |
|              | ID4  | 1.5 | 2.0 | 0.5 | 0.1 | 0.1  | 1.1 | 0.0 | 0.1 | 0.2 | 0.0  | 0.1 | 0.1 | 0.5 | 0.6  | 0.3  | 0.0   | 4.6                  |
|              | ID5  | 0.2 | 1.6 | 0.2 | 0.1 | 0.0  | 0.5 | 0.0 | 0.0 | 0.3 | 0.0  | 0.1 | 0.1 | 0.3 | 0.5  | 0.3  | 0.0   | 1.6                  |
|              | ID6  | 1.8 | 4.4 | 0.9 | 0.4 | 0.0  | 1.7 | 0.0 | 0.1 | 0.4 | 0.0  | 0.1 | 0.1 | 0.4 | 0.3  | 0.2  | 0.0   | 7.9                  |
|              | ID7  | 0.2 | 0.5 | 0.2 | 0.0 | 0.0  | 0.3 | 0.0 | 0.0 | 0.3 | 0.1  | 0.1 | 0.3 | 6.2 | 2.0  | 3.1  | 0.1   | 11.3                 |
|              | ID8  | 1.5 | 1.4 | 0.1 | 0.1 | 0.0  | 0.9 | 0.0 | 0.0 | 0.2 | 0.0  | 0.0 | 0.0 | 0.4 | 0.5  | 0.1  | 0.0   | 2.9                  |
|              | ID9  | 0.2 | 0.4 | 0.0 | 0.0 | 0.0  | 0.1 | 0.0 | 0.0 | 0.1 | 0.0  | 0.1 | 0.0 | 0.8 | 0.2  | 0.1  | 0.0   |                      |
|              | ID10 | 0.1 | 0.4 | 0.1 | 0.0 | 0.0  | 0.1 | 0.0 | 0.0 | 0.1 | 0.0  | 0.0 | 0.0 | 0.1 | 0.2  | 0.1  | 0.0   |                      |
|              | ID11 | 0.1 | 0.3 | 0.0 | 0.0 | 0.0  | 0.1 | 0.0 | 0.0 | 0.1 | 0.0  | 0.0 | 0.0 | 0.2 | 0.1  | 0.0  | 0.0   |                      |
|              | ID12 | 0.1 | 0.2 | 0.0 | 0.0 | 0.0  | 0.0 | 0.0 | 0.0 | 0.0 | 0.0  | 0.0 | 0.0 | 0.1 | 0.2  | 0.2  | 0.0   |                      |
|              | ID13 | 0.1 | 1.0 | 0.3 | 0.1 | 0.0  | 0.1 | 0.0 | 0.0 | 0.0 | 0.0  | 0.0 | 0.1 | 0.3 | 0.0  | 0.0  | 0.0   | 1.0                  |
|              | ID14 | 0.2 | 1.1 | 1.1 | 0.1 | 0.2  | 0.1 | 0.1 | 0.2 | 1.6 | 0.3  | 0.1 | 0.5 | 8.4 | 2.5  | 0.3  | 0.0   | 14.7                 |
|              | ID15 | 0.1 | 0.2 | 0.0 | 0.0 | 0.0  | 0.1 | 0.0 | 0.0 | 0.1 | 0.0  | 0.0 | 0.0 | 0.2 | 0.6  | 0.1  | 0.0   |                      |
|              | ID16 | 2.4 | 3.0 | 2.0 | 0.5 | 0.1  | 1.5 | 0.0 | 0.1 | 0.8 | 0.1  | 0.1 | 0.1 | 1.9 | 4.6  | 3.7  | 0.0   | 18.8                 |
|              | ID17 | 0.1 | 0.8 | 0.1 | 0.1 | 0.0  | 0.2 | 0.0 | 0.1 | 0.5 | 0.1  | 0.0 | 0.1 | 0.5 | 0.7  | 0.2  | 0.0   |                      |
|              | ID18 | 0.3 | 0.5 | 0.1 | 0.0 | 0.0  | 0.3 | 0.0 | 0.1 | 0.2 | 0.0  | 0.1 | 0.1 | 0.5 | 0.8  | 0.3  | 0.0   |                      |
|              | ID19 | 0.1 | 0.4 | 0.1 | 0.0 | 0.0  | 0.2 | 0.0 | 0.0 | 0.3 | 0.0  | 0.1 | 0.1 | 0.3 | 0.4  | 0.1  | 0.0   |                      |
|              | ID20 | 0.2 | 0.4 | 0.1 | 0.1 | 0.0  | 0.1 | 0.0 | 0.0 | 0.3 | 0.1  | 0.1 | 0.1 | 0.3 | 0.3  | 0.1  | 0.0   |                      |
| Outdoor dust | OD1  | 0.3 | 0.5 | 0.1 | 0.1 | 0.1  | 0.4 | 0.0 | 0.0 | 0.5 | 0.2  | 0.2 | 0.5 | 1.0 | 2.0  | 0.6  | 0.0   | 3.0                  |
|              | OD2  | 0.0 | 0.0 | 0.0 | 0.0 | 0.0  | 0.0 | 0.0 | 0.0 | 0.0 | 0.0  | 0.0 | 0.0 | 0.0 | 0.0  | 0.0  | 0.0   |                      |
|              | OD3  | 0.1 | 0.2 | 0.1 | 0.0 | 0.0  | 0.1 | 0.0 | 0.0 | 0.1 | 0.0  | 0.0 | 0.0 | 0.3 | 0.2  | 0.1  | 0.0   |                      |
|              | OD4  | 0.0 | 0.0 | 0.0 | 0.0 | 0.0  | 0.0 | 0.0 | 0.0 | 0.0 | 0.0  | 0.0 | 0.0 | 0.0 | 0.0  | 0.0  | 0.0   |                      |
|              | OD5  | 1.1 | 0.0 | 0.6 | 0.3 | 0.0  | 0.0 | 0.0 | 0.0 | 0.0 | 0.0  | 0.0 | 0.0 | 2.6 | 2.1  | 1.0  | 0.1   | 6.8                  |
|              | OD6  | 0.1 | 0.2 | 0.1 | 0.0 | 0.0  | 0.1 | 0.0 | 0.0 | 0.0 | 0.0  | 0.0 | 0.0 | 0.0 | 0.0  | 0.0  | 0.0   |                      |
|              | OD7  | 0.7 | 7.7 | 1.4 | 0.3 | 0.1  | 2.9 | 0.1 | 0.5 | 5.4 | 0.4  | 0.5 | 1.9 | 5.0 | 3.8  | 1.8  | 0.1   | 29.9                 |
|              | OD8  | 1.0 | 3.7 | 0.6 | 0.3 | 0.1  | 1.3 | 0.0 | 0.0 | 0.0 | 0.0  | 0.0 | 0.5 | 2.3 | 2.8  | 1.3  | 0.1   | 12.4                 |
|              | OD9  | 0.4 | 4.3 | 0.1 | 0.2 | 0.0  | 0.2 | 0.1 | 0.0 | 0.4 | 0.0  | 0.1 | 0.1 | 0.3 | 0.2  | 0.1  | 0.0   | 4.3                  |
|              | OD10 | 0.4 | 2.7 | 0.4 | 0.2 | 0.1  | 1.7 | 0.1 | 0.1 | 1.3 | 0.1  | 0.2 | 0.3 | 2.0 | 1.3  | 1.1  | 0.1   | 10.1                 |
|              | OD11 | 0.0 | 0.1 | 0.0 | 0.0 | 0.0  | 0.0 | 0.0 | 0.0 | 0.1 | 0.0  | 0.0 | 0.0 | 0.1 | 0.4  | 0.1  | 0.0   |                      |
|              | OD12 | 0.0 | 0.0 | 0.0 | 0.0 | 0.0  | 0.0 | 0.0 | 0.0 | 0.0 | 0.0  | 0.0 | 0.0 | 0.1 | 0.1  | 0.0  | 0.0   |                      |
|              | OD13 | 0.0 | 0.2 | 0.1 | 0.0 | 0.0  | 0.1 | 0.0 | 0.0 | 0.0 | 0.0  | 0.0 | 0.0 | 0.3 | 0.2  | 0.1  | 0.0   |                      |
|              | OD14 | 0.0 | 0.0 | 0.0 | 0.0 | 0.0  | 0.0 | 0.0 | 0.0 | 0.0 | 0.0  | 0.0 | 0.0 | 0.0 | 0.0  | 0.0  | 0.0   |                      |
|              | OD15 | 0.0 | 0.1 | 0.0 | 0.0 | 0.0  | 0.0 | 0.0 | 0.0 | 0.0 | 0.0  | 0.0 | 0.0 | 0.1 | 0.1  | 0.1  | 0.0   |                      |
|              | OD16 | 0.8 | 0.4 | 0.1 | 0.0 | 0.0  | 0.2 | 0.0 | 0.0 | 0.0 | 0.0  | 0.0 | 0.0 | 0.0 | 0.0  | 0.0  | 0.0   |                      |
|              | OD17 | 6.1 | 2.0 | 0.5 | 0.1 | 0.1  | 1.1 | 0.0 | 0.1 | 0.2 | 0.0  | 0.1 | 0.1 | 0.5 | 0.6  | 0.3  | 0.0   | 9.2                  |

|      |      |     |      |     |     |     |     |     |     |      |     |     |     |      |      |      |     |      |
|------|------|-----|------|-----|-----|-----|-----|-----|-----|------|-----|-----|-----|------|------|------|-----|------|
|      | OD18 | 0.0 | 0.0  | 0.0 | 0.0 | 0.0 | 0.0 | 0.0 | 0.0 | 0.0  | 0.0 | 0.0 | 0.0 | 0.6  | 0.2  | 0.3  | 0.0 |      |
|      | OD19 | 0.2 | 1.1  | 0.2 | 0.1 | 0.1 | 0.8 | 0.0 | 0.1 | 0.8  | 0.2 | 0.3 | 0.5 | 1.8  | 6.8  | 0.7  | 0.1 | 9.7  |
|      | OD20 | 0.1 | 0.1  | 0.0 | 0.0 | 0.0 | 0.0 | 0.0 | 0.0 | 0.1  | 0.0 | 0.0 | 0.0 | 0.1  | 0.2  | 0.1  | 0.1 |      |
| Soil | S1   | 6.1 | 2.0  | 0.5 | 0.1 | 0.1 | 1.1 | 0.0 | 0.1 | 0.2  | 0.0 | 0.1 | 0.1 | 0.5  | 0.6  | 0.3  | 0.0 | 9.2  |
|      | S2   | 1.6 | 6.7  | 1.5 | 0.7 | 0.3 | 2.1 | 0.1 | 0.2 | 3.0  | 0.2 | 0.7 | 0.6 | 3.4  | 3.7  | 7.1  | 0.2 | 29.1 |
|      | S3   | 0.9 | 1.4  | 0.1 | 0.4 | 0.2 | 0.1 | 0.3 | 0.0 | 1.5  | 0.3 | 0.2 | 0.4 | 2.1  | 1.3  | 0.8  | 0.1 | 6.3  |
|      | S4   | 0.0 | 0.0  | 0.0 | 0.0 | 0.0 | 0.0 | 0.0 | 0.0 | 0.0  | 0.4 | 1.3 | 0.8 | 10.3 | 5.1  | 3.2  | 0.1 | 19.9 |
|      | S5   | 0.2 | 1.6  | 0.2 | 0.1 | 0.0 | 0.5 | 0.0 | 0.0 | 0.3  | 0.0 | 0.1 | 0.1 | 0.3  | 0.5  | 0.3  | 0.0 | 1.6  |
|      | S6   | 0.0 | 0.0  | 0.0 | 0.0 | 0.0 | 0.0 | 0.0 | 0.0 | 0.0  | 0.1 | 1.3 | 0.1 | 9.3  | 4.4  | 4.7  | 0.1 | 19.7 |
|      | S7   | 0.0 | 0.0  | 0.0 | 0.0 | 0.0 | 0.0 | 0.0 | 0.0 | 0.0  | 0.3 | 0.4 | 0.8 | 5.4  | 2.8  | 3.0  | 0.1 | 11.2 |
|      | S8   | 5.1 | 1.8  | 0.5 | 0.2 | 0.2 | 5.5 | 0.1 | 0.8 | 5.2  | 0.2 | 0.3 | 0.2 | 9.7  | 1.3  | 0.6  | 0.2 | 28.6 |
|      | S9   | 2.8 | 2.3  | 0.7 | 2.8 | 1.2 | 4.8 | 0.9 | 0.9 | 7.7  | 0.2 | 3.0 | 0.5 | 1.3  | 0.5  | 0.4  | 0.0 | 26.0 |
|      | S10  | 0.0 | 0.0  | 0.0 | 0.0 | 0.0 | 0.0 | 0.0 | 0.0 | 0.0  | 0.6 | 0.3 | 0.9 | 2.2  | 4.0  | 1.2  | 0.1 | 7.4  |
|      | S11  | 1.4 | 20.9 | 1.5 | 0.6 | 0.4 | 2.1 | 0.3 | 0.5 | 7.2  | 0.4 | 1.4 | 3.2 | 4.0  | 5.0  | 2.8  | 0.1 | 42.9 |
|      | S12  | 1.1 | 4.7  | 0.9 | 0.4 | 0.6 | 1.9 | 0.4 | 0.7 | 4.4  | 1.1 | 1.3 | 3.2 | 6.4  | 24.9 | 14.0 | 0.5 | 63.0 |
|      | S13  | 7.9 | 1.0  | 2.1 | 0.0 | 0.3 | 1.2 | 0.3 | 1.2 | 7.2  | 3.1 | 2.8 | 5.8 | 14.7 | 21.2 | 3.8  | 0.5 | 72.0 |
|      | S14  | 0.2 | 0.8  | 0.1 | 0.1 | 0.0 | 0.2 | 0.0 | 0.0 | 0.2  | 0.0 | 0.2 | 0.3 | 1.4  | 1.5  | 0.7  | 0.1 | 2.9  |
|      | S15  | 2.8 | 31.0 | 0.9 | 0.6 | 0.1 | 1.7 | 0.1 | 0.1 | 2.6  | 0.7 | 0.8 | 1.0 | 7.2  | 11.8 | 4.5  | 0.1 | 62.6 |
|      | S16  | 0.1 | 6.7  | 1.8 | 0.4 | 0.2 | 2.2 | 0.1 | 0.3 | 13.7 | 0.2 | 1.8 | 7.8 | 9.2  | 2.2  | 0.3  | 0.0 | 45.4 |
|      | S17  | 0.7 | 7.3  | 1.5 | 0.9 | 0.2 | 1.3 | 0.2 | 0.3 | 1.4  | 0.3 | 0.6 | 1.6 | 7.6  | 7.5  | 3.5  | 0.4 | 31.7 |
|      | S18  | 1.3 | 5.4  | 0.9 | 0.3 | 0.1 | 1.2 | 0.1 | 0.1 | 2.0  | 0.2 | 1.4 | 0.8 | 4.2  | 6.0  | 4.0  | 0.4 | 25.5 |
|      | S19  | 0.1 | 0.1  | 0.0 | 0.0 | 0.0 | 0.1 | 0.0 | 0.0 | 0.0  | 0.0 | 0.0 | 0.0 | 0.0  | 0.0  | 0.0  | 0.0 |      |
|      | S20  | 4.1 | 2.7  | 0.6 | 0.8 | 0.3 | 5.6 | 0.3 | 0.4 | 0.5  | 0.4 | 0.6 | 1.1 | 0.8  | 0.5  | 0.7  | 0.0 | 13.5 |



**Table S11:** BaP<sub>TEQ</sub> and BaP<sub>MEQ</sub> ( $\mu\text{g kg}^{-1}$ ) of PAHs in indoor dust, outdoor dust and soils of Port Harcourt

| Matrix       | Code | BaA  | Chry | BbF   | BkF  | BaP  | IndP | DahA | BaP <sub>TEQ</sub> | BaA   | Chry | BbF  | BkF  | BaP  | IndP | DahA | BaP <sub>MEQ</sub> |
|--------------|------|------|------|-------|------|------|------|------|--------------------|-------|------|------|------|------|------|------|--------------------|
| Indoor dust  | ID1  | 1.00 | 0.01 | 1.20  | 0.14 | 12.0 | 1.40 | 22.0 | <b>37.7</b>        | 0.82  | 0.14 | 3.00 | 1.54 | 12.0 | 4.34 | 6.38 | <b>28.2</b>        |
|              | ID2  | 1.80 | 0.02 | 2.20  | 0.52 | 46.0 | 10.4 | 76.0 | <b>137</b>         | 1.48  | 0.34 | 5.50 | 5.72 | 46.0 | 32.2 | 22.0 | <b>113</b>         |
|              | ID3  | 71.2 | 0.94 | 11.8  | 1.14 | 34.0 | 4.20 | 28.0 | <b>151</b>         | 58.4  | 15.9 | 29.5 | 12.5 | 34.0 | 13.0 | 8.12 | <b>171</b>         |
|              | ID4  | 4.60 | 0.06 | 10.8  | 0.60 | 74.0 | 11.2 | 110  | <b>211</b>         | 3.77  | 0.95 | 27.0 | 6.60 | 74.0 | 34.7 | 31.9 | <b>179</b>         |
|              | ID5  | 6.60 | 0.03 | 4.00  | 1.02 | 50.0 | 9.60 | 96.0 | <b>167</b>         | 5.41  | 0.48 | 10.0 | 11.2 | 50.0 | 29.8 | 27.8 | <b>135</b>         |
|              | ID6  | 7.60 | 0.04 | 4.60  | 0.48 | 68.0 | 9.20 | 54.0 | <b>144</b>         | 6.23  | 0.65 | 11.5 | 5.28 | 68.0 | 28.5 | 15.7 | <b>136</b>         |
|              | ID7  | 4.80 | 0.11 | 8.40  | 2.42 | 998  | 117  | 352  | <b>1482</b>        | 3.94  | 1.94 | 21.0 | 26.6 | 998  | 361  | 102  | <b>1515</b>        |
|              | ID8  | 3.00 | 0.05 | 2.80  | 0.38 | 60.0 | 4.80 | 88.0 | <b>159</b>         | 2.46  | 0.85 | 7.00 | 4.18 | 60.0 | 14.9 | 25.5 | <b>115</b>         |
|              | ID9  | 1.40 | 0.02 | 4.00  | 0.30 | 124  | 5.20 | 34.0 | <b>169</b>         | 1.15  | 0.41 | 10.0 | 3.30 | 124  | 16.1 | 9.86 | <b>165</b>         |
|              | ID10 | 1.60 | 0.01 | 1.80  | 0.12 | 18.0 | 2.20 | 30.0 | <b>53.7</b>        | 1.31  | 0.17 | 4.50 | 1.32 | 18.0 | 6.82 | 8.70 | <b>40.8</b>        |
|              | ID11 | 1.00 | 0.01 | 0.60  | 0.14 | 28.0 | 1.40 | 10.0 | <b>41.1</b>        | 0.82  | 0.14 | 1.50 | 1.54 | 28.0 | 4.34 | 2.90 | <b>39.2</b>        |
|              | ID12 | 0.20 | 0.00 | 0.20  | 0.04 | 10.0 | 7.00 | 30.0 | <b>47.4</b>        | 0.16  | 0.03 | 0.50 | 0.44 | 10.0 | 21.7 | 8.70 | <b>41.5</b>        |
|              | ID13 | 0.00 | 0.04 | 0.00  | 0.48 | 48.0 | 0.00 | 0.00 | <b>48.5</b>        | 0.00  | 0.75 | 0.00 | 5.28 | 48.0 | 0.00 | 0.00 | <b>54.0</b>        |
|              | ID14 | 31.2 | 0.43 | 5.00  | 3.90 | 1338 | 12.2 | 442  | <b>1833</b>        | 25.6  | 7.28 | 12.5 | 42.9 | 1338 | 37.8 | 128  | <b>1592</b>        |
|              | ID15 | 2.80 | 0.01 | 3.20  | 0.26 | 32.0 | 3.80 | 108  | <b>150</b>         | 2.30  | 0.17 | 8.00 | 2.86 | 32.0 | 11.8 | 31.3 | <b>88.4</b>        |
|              | ID16 | 15.2 | 0.11 | 7.60  | 0.90 | 308  | 141  | 836  | <b>1309</b>        | 12.46 | 1.84 | 19.0 | 9.90 | 308  | 437  | 242  | <b>1031</b>        |
|              | ID17 | 9.20 | 0.14 | 3.00  | 0.80 | 78.0 | 6.00 | 118  | <b>215</b>         | 7.54  | 2.38 | 7.50 | 8.80 | 78.0 | 18.6 | 34.2 | <b>157</b>         |
|              | ID18 | 4.60 | 0.07 | 6.20  | 0.88 | 72.0 | 10.6 | 148  | <b>242</b>         | 3.77  | 1.16 | 15.5 | 9.68 | 72.0 | 32.9 | 42.9 | <b>178</b>         |
|              | ID19 | 6.60 | 0.04 | 7.20  | 0.42 | 52.0 | 4.80 | 74.0 | <b>145</b>         | 5.41  | 0.61 | 18.0 | 4.62 | 52.0 | 14.9 | 21.5 | <b>117</b>         |
|              | ID20 | 5.20 | 0.08 | 4.20  | 0.60 | 40.0 | 2.60 | 58.0 | <b>111</b>         | 4.26  | 1.43 | 10.5 | 6.60 | 40.0 | 8.06 | 16.8 | <b>87.7</b>        |
| Outdoor dust | OD1  | 9.40 | 0.36 | 13.80 | 4.14 | 154  | 24.4 | 352  | <b>558</b>         | 7.71  | 6.05 | 34.5 | 45.5 | 154  | 75.6 | 102  | <b>426</b>         |
|              | OD2  | 0.20 | 0.00 | 0.20  | 0.08 | 6.00 | 0.80 | 8.00 | <b>15.3</b>        | 0.16  | 0.07 | 0.50 | 0.88 | 6.00 | 2.48 | 2.32 | <b>12.4</b>        |
|              | OD3  | 1.00 | 0.01 | 1.80  | 0.28 | 52.0 | 4.00 | 44.0 | <b>103</b>         | 0.82  | 0.10 | 4.50 | 3.08 | 52.0 | 12.4 | 12.8 | <b>85.7</b>        |
|              | OD4  | 0.00 | 0.00 | 0.20  | 0.02 | 2.00 | 0.40 | 8.00 | <b>10.6</b>        | 0.00  | 0.03 | 0.50 | 0.22 | 2.00 | 1.24 | 2.32 | <b>6.31</b>        |
|              | OD5  | 0.00 | 0.00 | 0.00  | 0.00 | 414  | 37.4 | 374  | <b>825</b>         | 0.00  | 0.00 | 0.00 | 0.00 | 414  | 116  | 108  | <b>638</b>         |
|              | OD6  | 0.00 | 0.00 | 0.00  | 0.00 | 0.00 | 0.00 | 0.00 | <b>0.00</b>        | 0.00  | 0.00 | 0.00 | 0.00 | 0.00 | 0.00 | 0.00 | <b>0.00</b>        |
|              | OD7  | 103  | 0.67 | 43.40 | 15.0 | 802  | 68.4 | 680  | <b>1713</b>        | 84.8  | 11.5 | 109  | 165  | 802  | 212  | 197  | <b>1581</b>        |
|              | OD8  | 0.00 | 0.00 | 0.00  | 3.70 | 370  | 51.2 | 512  | <b>937</b>         | 0.00  | 0.00 | 0.00 | 40.7 | 370  | 159  | 148  | <b>718</b>         |
|              | OD9  | 7.80 | 0.05 | 5.20  | 0.46 | 48.0 | 5.00 | 40.0 | <b>107</b>         | 6.40  | 0.85 | 13.0 | 5.06 | 48.0 | 15.5 | 11.6 | <b>100</b>         |
|              | OD10 | 25.4 | 0.11 | 12.6  | 2.60 | 326  | 40.4 | 236  | <b>643</b>         | 20.8  | 1.87 | 31.5 | 28.6 | 326  | 125  | 68.4 | <b>602</b>         |
|              | OD11 | 1.00 | 0.00 | 0.60  | 0.10 | 12.0 | 2.40 | 64.0 | <b>80.1</b>        | 0.82  | 0.03 | 1.50 | 1.10 | 12.0 | 7.44 | 18.6 | <b>41.5</b>        |
|              | OD12 | 0.00 | 0.00 | 0.20  | 0.06 | 12.0 | 1.00 | 10.0 | <b>23.3</b>        | 0.00  | 0.03 | 0.50 | 0.66 | 12.0 | 3.10 | 2.90 | <b>19.2</b>        |
|              | OD13 | 0.80 | 0.02 | 0.60  | 0.16 | 50.0 | 4.20 | 32.0 | <b>87.8</b>        | 0.66  | 0.27 | 1.50 | 1.76 | 50.0 | 13.0 | 9.28 | <b>76.5</b>        |
|              | OD14 | 0.00 | 0.00 | 0.20  | 0.00 | 2.00 | 0.20 | 4.0  | <b>6.40</b>        | 0.00  | 0.07 | 0.50 | 0.00 | 2.00 | 0.62 | 1.16 | <b>4.35</b>        |
|              | OD15 | 0.20 | 0.00 | 0.60  | 0.14 | 16.0 | 2.20 | 22.0 | <b>41.1</b>        | 0.16  | 0.03 | 1.50 | 1.54 | 16.0 | 6.82 | 6.38 | <b>32.4</b>        |
|              | OD16 | 0.80 | 0.00 | 0.40  | 0.04 | 6.00 | 1.00 | 6.00 | <b>14.2</b>        | 0.66  | 0.07 | 1.00 | 0.44 | 6.00 | 3.10 | 1.74 | <b>13.0</b>        |
|              | OD17 | 4.60 | 0.06 | 10.8  | 0.60 | 74.0 | 11.2 | 110  | <b>211</b>         | 3.77  | 0.95 | 27.0 | 6.60 | 74.0 | 34.7 | 31.9 | <b>179</b>         |

|      |      |      |      |      |      |      |      |             |             |      |      |      |      |      |      |             |             |
|------|------|------|------|------|------|------|------|-------------|-------------|------|------|------|------|------|------|-------------|-------------|
| Soil | OD18 | 0.40 | 0.01 | 0.80 | 0.24 | 100  | 11.6 | 36.0        | <b>149</b>  | 0.33 | 0.20 | 2.00 | 2.64 | 100  | 36.0 | 10.4        | <b>152</b>  |
|      | OD19 | 15.4 | 0.32 | 21.2 | 3.66 | 290  | 27.0 | 1218        | <b>1576</b> | 12.6 | 5.44 | 53.0 | 40.3 | 290  | 83.7 | 353         | <b>838</b>  |
|      | OD20 | 1.00 | 0.01 | 1.20 | 0.26 | 22.0 | 5.20 | 38.0        | <b>67.7</b> | 0.82 | 0.17 | 3.00 | 2.86 | 22.0 | 16.1 | 11.0        | <b>56.0</b> |
|      | S1   | 4.60 | 0.06 | 10.8 | 0.60 | 74.0 | 11.2 | 110         | <b>211</b>  | 3.77 | 0.95 | 27.0 | 6.60 | 74.0 | 34.7 | 31.9        | <b>179</b>  |
|      | S2   | 56.4 | 0.35 | 56.6 | 5.04 | 548  | 269  | 658         | <b>1594</b> | 46.2 | 5.92 | 142  | 55.4 | 548  | 835  | 191         | <b>1822</b> |
|      | S3   | 27.6 | 0.42 | 19.6 | 3.48 | 340  | 29.8 | 242         | <b>663</b>  | 22.6 | 7.17 | 49.0 | 38.3 | 340  | 92.4 | 70.2        | <b>620</b>  |
|      | S4   | 0.00 | 0.67 | 106  | 6.18 | 1650 | 120  | 926         | <b>2809</b> | 0.00 | 11.4 | 265  | 68.0 | 1650 | 373  | 269         | <b>2635</b> |
|      | S5   | 6.60 | 0.03 | 4.00 | 1.02 | 50.0 | 9.60 | 96          | <b>167</b>  | 5.41 | 0.48 | 10.0 | 11.2 | 50.0 | 29.8 | 27.8        | <b>135</b>  |
|      | S6   | 0.00 | 0.14 | 104  | 0.44 | 1488 | 179  | 794         | <b>2566</b> | 0.00 | 2.41 | 261  | 4.84 | 1488 | 556  | 230         | <b>2543</b> |
|      | S7   | 0.00 | 0.48 | 35.2 | 6.36 | 870  | 114  | 496         | <b>1522</b> | 0.00 | 8.16 | 88.0 | 70.0 | 870  | 354  | 144         | <b>1534</b> |
|      | S8   | 98.8 | 0.35 | 21.0 | 1.54 | 1548 | 23.6 | 236         | <b>1929</b> | 81.0 | 5.95 | 52.5 | 16.9 | 1548 | 73.2 | 68.4        | <b>1846</b> |
|      | S9   | 147  | 0.25 | 237  | 3.96 | 202  | 13.8 | 92.0        | <b>696</b>  | 120  | 4.32 | 593  | 43.6 | 202  | 42.8 | 26.7        | <b>1032</b> |
|      | S10  | 0.00 | 0.88 | 27.6 | 7.32 | 352  | 47.0 | 720         | <b>1155</b> | 0.00 | 15.0 | 69.0 | 80.5 | 352  | 146  | 209         | <b>871</b>  |
|      | S11  | 137  | 0.59 | 109  | 25.7 | 636  | 106  | 896         | <b>1910</b> | 113  | 10.1 | 273  | 282  | 636  | 328  | 260         | <b>1902</b> |
|      | S12  | 83.0 | 1.82 | 105  | 25.3 | 1030 | 533  | 4478        | <b>6256</b> | 68.1 | 30.9 | 263  | 278  | 1030 | 1652 | 1299        | <b>4621</b> |
|      | S13  | 137  | 5.03 | 222  | 45.4 | 2348 | 146  | 3822        | <b>6725</b> | 112  | 85.5 | 555  | 500  | 2348 | 453  | 1108        | <b>5161</b> |
|      | S14  | 3.00 | 0.06 | 15.4 | 2.06 | 216  | 25.6 | 272         | <b>534</b>  | 2.46 | 1.05 | 38.5 | 22.7 | 216  | 79.4 | 78.9        | <b>439</b>  |
|      | S15  | 50.2 | 1.07 | 64.4 | 7.60 | 1150 | 169  | 2132        | <b>3574</b> | 41.2 | 18.2 | 161  | 83.6 | 1150 | 525  | 618         | <b>2597</b> |
|      | S16  | 260  | 0.27 | 140  | 61.6 | 1478 | 13.2 | 404         | <b>2357</b> | 213  | 4.59 | 349  | 677  | 1478 | 40.9 | 117         | <b>2880</b> |
|      | S17  | 26.0 | 0.43 | 47.8 | 12.8 | 1222 | 135  | 1348        | <b>2792</b> | 21.3 | 7.28 | 120  | 141  | 1222 | 418  | 391         | <b>2320</b> |
| S18  | 37.8 | 0.26 | 109  | 6.50 | 670  | 153  | 1084 | <b>2060</b> | 31.0        | 4.49 | 272  | 71.5 | 670  | 473  | 314  | <b>1836</b> |             |
| S19  | 0.20 | 0.00 | 0.20 | 0.04 | 6.00 | 0.40 | 8.00 | <b>14.8</b> | 0.16        | 0.07 | 0.50 | 0.44 | 6.00 | 1.24 | 2.32 | <b>10.7</b> |             |
| S20  | 10.4 | 0.67 | 47.0 | 8.56 | 128  | 25.2 | 82.0 | <b>302</b>  | 8.53        | 11.4 | 118  | 94.2 | 128  | 78.1 | 23.8 | <b>462</b>  |             |

**Table S12:** Hazard indices for PAHs in indoor dust, outdoor dust and soils of Port Harcourt

| Matrix       | Code | CHILD                 |                       |                       |                                         | ADULT                 |                       |                       |                                         |
|--------------|------|-----------------------|-----------------------|-----------------------|-----------------------------------------|-----------------------|-----------------------|-----------------------|-----------------------------------------|
|              |      | HQ <sub>ing</sub>     | HQ <sub>inh</sub>     | HQ <sub>dermal</sub>  | HI                                      | HQ <sub>ing</sub>     | HQ <sub>inh</sub>     | HQ <sub>dermal</sub>  | HI                                      |
| Indoor dust  | ID1  | $9.38 \times 10^{-2}$ | $1.42 \times 10^{-4}$ | $2.71 \times 10^{-4}$ | <b><math>9.42 \times 10^{-2}</math></b> | $8.79 \times 10^{-3}$ | $5.19 \times 10^{-5}$ | $3.62 \times 10^{-5}$ | <b><math>8.88 \times 10^{-3}</math></b> |
|              | ID2  | $1.14 \times 10^{-1}$ | $1.86 \times 10^{-4}$ | $3.29 \times 10^{-4}$ | <b><math>1.15 \times 10^{-1}</math></b> | $1.07 \times 10^{-2}$ | $6.82 \times 10^{-5}$ | $4.40 \times 10^{-5}$ | <b><math>1.08 \times 10^{-2}</math></b> |
|              | ID3  | 1.17                  | $3.09 \times 10^{-4}$ | $3.31 \times 10^{-3}$ | <b>1.18</b>                             | $1.10 \times 10^{-1}$ | $8.72 \times 10^{-5}$ | $4.42 \times 10^{-4}$ | <b><math>1.11 \times 10^{-1}</math></b> |
|              | ID4  | 1.01                  | $1.75 \times 10^{-3}$ | $2.91 \times 10^{-3}$ | <b>1.02</b>                             | $9.47 \times 10^{-2}$ | $6.44 \times 10^{-4}$ | $3.88 \times 10^{-4}$ | <b><math>9.58 \times 10^{-2}</math></b> |
|              | ID5  | $3.03 \times 10^{-1}$ | $2.77 \times 10^{-4}$ | $8.67 \times 10^{-4}$ | <b><math>3.05 \times 10^{-1}</math></b> | $2.84 \times 10^{-2}$ | $9.29 \times 10^{-5}$ | $1.16 \times 10^{-4}$ | <b><math>2.87 \times 10^{-2}</math></b> |
|              | ID6  | 1.42                  | $2.18 \times 10^{-3}$ | $4.01 \times 10^{-3}$ | <b>1.43</b>                             | $1.33 \times 10^{-1}$ | $7.83 \times 10^{-4}$ | $5.35 \times 10^{-4}$ | <b><math>1.34 \times 10^{-1}</math></b> |
|              | ID7  | $2.24 \times 10^{-1}$ | $2.32 \times 10^{-4}$ | $6.52 \times 10^{-4}$ | <b><math>2.25 \times 10^{-1}</math></b> | $2.10 \times 10^{-2}$ | $8.51 \times 10^{-5}$ | $8.72 \times 10^{-5}$ | <b><math>2.12 \times 10^{-2}</math></b> |
|              | ID8  | $8.01 \times 10^{-1}$ | $1.71 \times 10^{-3}$ | $2.26 \times 10^{-3}$ | <b><math>8.05 \times 10^{-1}</math></b> | $7.51 \times 10^{-2}$ | $6.32 \times 10^{-4}$ | $3.02 \times 10^{-4}$ | <b><math>7.61 \times 10^{-2}</math></b> |
|              | ID9  | $1.82 \times 10^{-1}$ | $2.94 \times 10^{-4}$ | $5.21 \times 10^{-4}$ | <b><math>1.83 \times 10^{-1}</math></b> | $1.71 \times 10^{-2}$ | $1.08 \times 10^{-4}$ | $6.96 \times 10^{-5}$ | <b><math>1.73 \times 10^{-2}</math></b> |
|              | ID10 | $1.23 \times 10^{-1}$ | $1.52 \times 10^{-4}$ | $3.68 \times 10^{-4}$ | <b><math>1.23 \times 10^{-1}</math></b> | $1.15 \times 10^{-2}$ | $5.50 \times 10^{-5}$ | $4.91 \times 10^{-5}$ | <b><math>1.16 \times 10^{-2}</math></b> |
|              | ID11 | $7.79 \times 10^{-2}$ | $1.07 \times 10^{-4}$ | $2.25 \times 10^{-4}$ | <b><math>7.82 \times 10^{-2}</math></b> | $7.30 \times 10^{-3}$ | $3.83 \times 10^{-5}$ | $3.00 \times 10^{-5}$ | <b><math>7.37 \times 10^{-3}</math></b> |
|              | ID12 | $3.86 \times 10^{-2}$ | $6.50 \times 10^{-5}$ | $1.10 \times 10^{-4}$ | <b><math>3.88 \times 10^{-2}</math></b> | $3.62 \times 10^{-3}$ | $2.31 \times 10^{-5}$ | $1.47 \times 10^{-5}$ | <b><math>3.66 \times 10^{-3}</math></b> |
|              | ID13 | $1.82 \times 10^{-1}$ | $1.37 \times 10^{-4}$ | $5.11 \times 10^{-4}$ | <b><math>1.83 \times 10^{-1}</math></b> | $1.71 \times 10^{-2}$ | $4.37 \times 10^{-5}$ | $6.82 \times 10^{-5}$ | <b><math>1.72 \times 10^{-2}</math></b> |
|              | ID14 | $8.57 \times 10^{-1}$ | $3.92 \times 10^{-4}$ | $2.57 \times 10^{-3}$ | <b><math>8.60 \times 10^{-1}</math></b> | $8.04 \times 10^{-2}$ | $1.50 \times 10^{-4}$ | $3.43 \times 10^{-4}$ | <b><math>8.09 \times 10^{-2}</math></b> |
|              | ID15 | $5.78 \times 10^{-2}$ | $7.99 \times 10^{-5}$ | $1.68 \times 10^{-4}$ | <b><math>5.80 \times 10^{-2}</math></b> | $5.42 \times 10^{-3}$ | $2.90 \times 10^{-5}$ | $2.24 \times 10^{-5}$ | <b><math>5.47 \times 10^{-3}</math></b> |
|              | ID16 | 1.92                  | $2.87 \times 10^{-3}$ | $5.48 \times 10^{-3}$ | <b>1.93</b>                             | $1.80 \times 10^{-1}$ | $1.06 \times 10^{-3}$ | $7.33 \times 10^{-4}$ | <b><math>1.82 \times 10^{-1}</math></b> |
|              | ID17 | $2.03 \times 10^{-1}$ | $1.55 \times 10^{-4}$ | $5.91 \times 10^{-4}$ | <b><math>2.04 \times 10^{-1}</math></b> | $1.91 \times 10^{-2}$ | $5.38 \times 10^{-5}$ | $7.89 \times 10^{-5}$ | <b><math>1.92 \times 10^{-2}</math></b> |
|              | ID18 | $2.95 \times 10^{-1}$ | $3.88 \times 10^{-4}$ | $8.56 \times 10^{-4}$ | <b><math>2.96 \times 10^{-1}</math></b> | $2.77 \times 10^{-2}$ | $1.44 \times 10^{-4}$ | $1.14 \times 10^{-4}$ | <b><math>2.79 \times 10^{-2}</math></b> |
|              | ID19 | $1.43 \times 10^{-1}$ | $1.48 \times 10^{-4}$ | $4.18 \times 10^{-4}$ | <b><math>1.43 \times 10^{-1}</math></b> | $1.34 \times 10^{-2}$ | $5.37 \times 10^{-5}$ | $5.59 \times 10^{-5}$ | <b><math>1.35 \times 10^{-2}</math></b> |
|              | ID20 | $1.99 \times 10^{-1}$ | $2.50 \times 10^{-4}$ | $5.73 \times 10^{-4}$ | <b><math>2.00 \times 10^{-1}</math></b> | $1.87 \times 10^{-2}$ | $9.15 \times 10^{-5}$ | $7.66 \times 10^{-5}$ | <b><math>1.89 \times 10^{-2}</math></b> |
| Outdoor dust | OD1  | $3.66 \times 10^{-1}$ | $3.48 \times 10^{-4}$ | $1.09 \times 10^{-3}$ | <b><math>3.68 \times 10^{-1}</math></b> | $3.44 \times 10^{-2}$ | $1.30 \times 10^{-4}$ | $1.45 \times 10^{-4}$ | <b><math>3.46 \times 10^{-2}</math></b> |
|              | OD2  | $1.54 \times 10^{-2}$ | $1.84 \times 10^{-5}$ | $4.50 \times 10^{-5}$ | <b><math>1.55 \times 10^{-2}</math></b> | $1.45 \times 10^{-3}$ | $6.71 \times 10^{-6}$ | $6.01 \times 10^{-6}$ | <b><math>1.46 \times 10^{-3}</math></b> |
|              | OD3  | $6.77 \times 10^{-2}$ | $6.80 \times 10^{-5}$ | $1.95 \times 10^{-4}$ | <b><math>6.80 \times 10^{-2}</math></b> | $6.35 \times 10^{-3}$ | $2.46 \times 10^{-5}$ | $2.60 \times 10^{-5}$ | <b><math>6.40 \times 10^{-3}</math></b> |
|              | OD4  | $7.20 \times 10^{-3}$ | $4.25 \times 10^{-6}$ | $2.08 \times 10^{-5}$ | <b><math>7.23 \times 10^{-3}</math></b> | $6.75 \times 10^{-4}$ | $1.53 \times 10^{-6}$ | $2.77 \times 10^{-6}$ | <b><math>6.80 \times 10^{-4}</math></b> |
|              | OD5  | $6.91 \times 10^{-1}$ | $1.25 \times 10^{-3}$ | $1.93 \times 10^{-3}$ | <b><math>6.94 \times 10^{-1}</math></b> | $6.48 \times 10^{-2}$ | $4.69 \times 10^{-4}$ | $2.58 \times 10^{-4}$ | <b><math>6.55 \times 10^{-2}</math></b> |
|              | OD6  | $7.88 \times 10^{-2}$ | $1.03 \times 10^{-4}$ | $2.32 \times 10^{-4}$ | <b><math>7.91 \times 10^{-2}</math></b> | $7.38 \times 10^{-3}$ | $3.71 \times 10^{-5}$ | $3.10 \times 10^{-5}$ | <b><math>7.45 \times 10^{-3}</math></b> |
|              | OD7  | 1.68                  | $1.11 \times 10^{-3}$ | $4.82 \times 10^{-3}$ | <b>1.68</b>                             | $1.57 \times 10^{-1}$ | $3.69 \times 10^{-4}$ | $6.44 \times 10^{-4}$ | <b><math>1.58 \times 10^{-1}</math></b> |
|              | OD8  | $9.63 \times 10^{-1}$ | $1.30 \times 10^{-3}$ | $2.83 \times 10^{-3}$ | <b><math>9.68 \times 10^{-1}</math></b> | $9.03 \times 10^{-2}$ | $4.61 \times 10^{-4}$ | $3.78 \times 10^{-4}$ | <b><math>9.12 \times 10^{-2}</math></b> |
|              | OD9  | $6.08 \times 10^{-1}$ | $6.15 \times 10^{-4}$ | $1.74 \times 10^{-3}$ | <b><math>6.11 \times 10^{-1}</math></b> | $5.70 \times 10^{-2}$ | $1.99 \times 10^{-4}$ | $2.33 \times 10^{-4}$ | <b><math>5.75 \times 10^{-2}</math></b> |
|              | OD10 | $7.66 \times 10^{-1}$ | $6.18 \times 10^{-4}$ | $2.24 \times 10^{-3}$ | <b><math>7.69 \times 10^{-1}</math></b> | $7.18 \times 10^{-2}$ | $2.18 \times 10^{-4}$ | $2.99 \times 10^{-4}$ | <b><math>7.23 \times 10^{-2}</math></b> |
|              | OD11 | $3.34 \times 10^{-2}$ | $4.32 \times 10^{-5}$ | $1.01 \times 10^{-4}$ | <b><math>3.35 \times 10^{-2}</math></b> | $3.13 \times 10^{-3}$ | $1.60 \times 10^{-5}$ | $1.35 \times 10^{-5}$ | <b><math>3.16 \times 10^{-3}</math></b> |
|              | OD12 | $1.80 \times 10^{-2}$ | $3.41 \times 10^{-5}$ | $5.10 \times 10^{-5}$ | <b><math>1.81 \times 10^{-2}</math></b> | $1.69 \times 10^{-3}$ | $1.26 \times 10^{-5}$ | $6.81 \times 10^{-6}$ | <b><math>1.71 \times 10^{-3}</math></b> |
|              | OD13 | $5.41 \times 10^{-2}$ | $5.55 \times 10^{-5}$ | $1.54 \times 10^{-4}$ | <b><math>5.43 \times 10^{-2}</math></b> | $5.07 \times 10^{-3}$ | $1.92 \times 10^{-5}$ | $2.05 \times 10^{-5}$ | <b><math>5.11 \times 10^{-3}</math></b> |
|              | OD14 | $1.00 \times 10^{-2}$ | $2.03 \times 10^{-5}$ | $2.80 \times 10^{-5}$ | <b><math>1.01 \times 10^{-2}</math></b> | $9.39 \times 10^{-4}$ | $7.53 \times 10^{-6}$ | $3.75 \times 10^{-6}$ | <b><math>9.50 \times 10^{-4}</math></b> |
|              | OD15 | $3.63 \times 10^{-2}$ | $6.10 \times 10^{-5}$ | $1.03 \times 10^{-4}$ | <b><math>3.64 \times 10^{-2}</math></b> | $3.40 \times 10^{-3}$ | $2.18 \times 10^{-5}$ | $1.37 \times 10^{-5}$ | <b><math>3.44 \times 10^{-3}</math></b> |
|              | OD16 | $3.98 \times 10^{-1}$ | $8.77 \times 10^{-4}$ | $1.12 \times 10^{-3}$ | <b><math>4.00 \times 10^{-1}</math></b> | $3.73 \times 10^{-2}$ | $3.25 \times 10^{-4}$ | $1.49 \times 10^{-4}$ | <b><math>3.78 \times 10^{-2}</math></b> |
|              | OD17 | 3.06                  | $7.01 \times 10^{-3}$ | $8.63 \times 10^{-3}$ | <b>3.07</b>                             | $2.87 \times 10^{-1}$ | $2.62 \times 10^{-3}$ | $1.15 \times 10^{-3}$ | <b><math>2.90 \times 10^{-1}</math></b> |
|              | OD18 | $2.22 \times 10^{-2}$ | $2.26 \times 10^{-5}$ | $6.44 \times 10^{-5}$ | <b><math>2.22 \times 10^{-2}</math></b> | $2.08 \times 10^{-3}$ | $8.26 \times 10^{-6}$ | $8.61 \times 10^{-6}$ | <b><math>2.09 \times 10^{-3}</math></b> |
|              | OD19 | $3.66 \times 10^{-1}$ | $2.47 \times 10^{-4}$ | $1.08 \times 10^{-3}$ | <b><math>3.67 \times 10^{-1}</math></b> | $3.43 \times 10^{-2}$ | $8.81 \times 10^{-5}$ | $1.44 \times 10^{-4}$ | <b><math>3.45 \times 10^{-2}</math></b> |
|              | OD20 | $5.66 \times 10^{-2}$ | $9.11 \times 10^{-5}$ | $1.63 \times 10^{-4}$ | <b><math>5.69 \times 10^{-2}</math></b> | $5.31 \times 10^{-3}$ | $3.35 \times 10^{-5}$ | $2.17 \times 10^{-5}$ | <b><math>5.36 \times 10^{-3}</math></b> |
| Soil         | S1   | 3.06                  | $7.01 \times 10^{-3}$ | $8.63 \times 10^{-3}$ | <b>3.07</b>                             | $2.87 \times 10^{-1}$ | $2.62 \times 10^{-3}$ | $1.15 \times 10^{-3}$ | <b><math>2.90 \times 10^{-1}</math></b> |
|              | S2   | 2.10                  | $2.16 \times 10^{-3}$ | $6.16 \times 10^{-3}$ | <b>2.11</b>                             | $1.97 \times 10^{-1}$ | $7.67 \times 10^{-4}$ | $8.24 \times 10^{-4}$ | <b><math>1.99 \times 10^{-1}</math></b> |
|              | S3   | 1.44                  | $1.23 \times 10^{-3}$ | $4.26 \times 10^{-3}$ | <b>1.45</b>                             | $1.35 \times 10^{-1}$ | $4.67 \times 10^{-4}$ | $5.69 \times 10^{-4}$ | <b><math>1.36 \times 10^{-1}</math></b> |
|              | S4   | 0.00                  | 0.00                  | 0.00                  | <b>0.00</b>                             | 0.00                  | 0.00                  | 0.00                  | <b>0.00</b>                             |
|              | S5   | $3.03 \times 10^{-1}$ | $2.77 \times 10^{-4}$ | $8.67 \times 10^{-4}$ | <b><math>3.05 \times 10^{-1}</math></b> | $2.84 \times 10^{-2}$ | $9.29 \times 10^{-5}$ | $1.16 \times 10^{-4}$ | <b><math>2.87 \times 10^{-2}</math></b> |
|              | S6   | 0.00                  | 0.00                  | 0.00                  | <b>0.00</b>                             | 0.00                  | 0.00                  | 0.00                  | <b>0.00</b>                             |
|              | S7   | 0.00                  | 0.00                  | 0.00                  | <b>0.00</b>                             | 0.00                  | 0.00                  | 0.00                  | <b>0.00</b>                             |
|              | S8   | 3.65                  | $5.99 \times 10^{-3}$ | $1.05 \times 10^{-2}$ | <b>3.67</b>                             | $3.42 \times 10^{-1}$ | $2.26 \times 10^{-3}$ | $1.40 \times 10^{-3}$ | <b><math>3.46 \times 10^{-1}</math></b> |
|              | S9   | 6.32                  | $3.90 \times 10^{-3}$ | $1.90 \times 10^{-2}$ | <b>6.34</b>                             | $5.92 \times 10^{-1}$ | $1.52 \times 10^{-3}$ | $2.54 \times 10^{-3}$ | <b><math>5.96 \times 10^{-1}</math></b> |
|              | S10  | 0.00                  | 0.00                  | 0.00                  | <b>0.00</b>                             | 0.00                  | 0.00                  | 0.00                  | <b>0.00</b>                             |
|              | S11  | 3.21                  | $2.43 \times 10^{-3}$ | $9.44 \times 10^{-3}$ | <b>3.22</b>                             | $3.01 \times 10^{-1}$ | $7.70 \times 10^{-4}$ | $1.26 \times 10^{-3}$ | <b><math>3.03 \times 10^{-1}</math></b> |
|              | S12  | 2.72                  | $1.60 \times 10^{-3}$ | $8.20 \times 10^{-3}$ | <b>2.73</b>                             | $2.55 \times 10^{-1}$ | $6.04 \times 10^{-4}$ | $1.10 \times 10^{-3}$ | <b><math>2.56 \times 10^{-1}</math></b> |
|              | S13  | 5.51                  | $9.20 \times 10^{-3}$ | $1.58 \times 10^{-2}$ | <b>5.54</b>                             | $5.17 \times 10^{-1}$ | $3.48 \times 10^{-3}$ | $2.11 \times 10^{-3}$ | <b><math>5.22 \times 10^{-1}</math></b> |
|              | S14  | $1.92 \times 10^{-1}$ | $2.11 \times 10^{-4}$ | $5.51 \times 10^{-4}$ | <b><math>1.93 \times 10^{-1}</math></b> | $1.80 \times 10^{-2}$ | $7.35 \times 10^{-5}$ | $7.36 \times 10^{-5}$ | <b><math>1.82 \times 10^{-2}</math></b> |
|              | S15  | 3.23                  | $4.19 \times 10^{-3}$ | $9.21 \times 10^{-3}$ | <b>3.24</b>                             | $3.03 \times 10^{-1}$ | $1.32 \times 10^{-3}$ | $1.23 \times 10^{-3}$ | <b><math>3.05 \times 10^{-1}</math></b> |
|              | S16  | 1.30                  | $4.50 \times 10^{-4}$ | $3.80 \times 10^{-3}$ | <b>1.30</b>                             | $1.22 \times 10^{-1}$ | $1.26 \times 10^{-4}$ | $5.08 \times 10^{-4}$ | <b><math>1.22 \times 10^{-1}</math></b> |
|              | S17  | 2.05                  | $1.13 \times 10^{-3}$ | $6.01 \times 10^{-3}$ | <b>2.06</b>                             | $1.92 \times 10^{-1}$ | $3.82 \times 10^{-4}$ | $8.03 \times 10^{-4}$ | <b><math>1.94 \times 10^{-1}</math></b> |

|     |                       |                       |                       |                                         |                       |                       |                       |                                         |
|-----|-----------------------|-----------------------|-----------------------|-----------------------------------------|-----------------------|-----------------------|-----------------------|-----------------------------------------|
| S18 | 1.36                  | $1.75 \times 10^{-3}$ | $3.89 \times 10^{-3}$ | <b>1.36</b>                             | $1.27 \times 10^{-1}$ | $6.16 \times 10^{-4}$ | $5.20 \times 10^{-4}$ | <b><math>1.28 \times 10^{-1}</math></b> |
| S19 | $8.06 \times 10^{-2}$ | $1.73 \times 10^{-4}$ | $2.28 \times 10^{-4}$ | <b><math>8.10 \times 10^{-2}</math></b> | $7.56 \times 10^{-3}$ | $6.38 \times 10^{-5}$ | $3.04 \times 10^{-5}$ | <b><math>7.65 \times 10^{-3}</math></b> |
| S20 | 3.60                  | $4.93 \times 10^{-3}$ | $1.04 \times 10^{-2}$ | <b>3.62</b>                             | $3.37 \times 10^{-1}$ | $1.85 \times 10^{-3}$ | $1.39 \times 10^{-3}$ | <b><math>3.41 \times 10^{-1}</math></b> |

**Table S13:** Total cancer risk of PAHs in indoor dust, outdoor dust and soils of Port Harcourt

|              |      | CHILD                 |                        |                        |                       | ADULT                 |                        |                        |                       |
|--------------|------|-----------------------|------------------------|------------------------|-----------------------|-----------------------|------------------------|------------------------|-----------------------|
| Matrix       | Code | Risk <sub>ing</sub>   | Risk <sub>inh</sub>    | Risk <sub>dermal</sub> | Total Cancer Risk     | Risk <sub>ing</sub>   | Risk <sub>inh</sub>    | Risk <sub>dermal</sub> | Total Cancer Risk     |
| Indoor dust  | ID1  | $3.52 \times 10^{-3}$ | $9.56 \times 10^{-10}$ | $1.28 \times 10^{-3}$  | $4.81 \times 10^{-3}$ | $1.20 \times 10^{-4}$ | $6.95 \times 10^{-10}$ | $6.23 \times 10^{-5}$  | $1.82 \times 10^{-4}$ |
|              | ID2  | $1.28 \times 10^{-2}$ | $3.46 \times 10^{-9}$  | $4.65 \times 10^{-3}$  | $1.74 \times 10^{-2}$ | $4.36 \times 10^{-4}$ | $2.52 \times 10^{-9}$  | $2.26 \times 10^{-4}$  | $6.62 \times 10^{-4}$ |
|              | ID3  | $1.41 \times 10^{-2}$ | $4.01 \times 10^{-9}$  | $5.14 \times 10^{-3}$  | $1.93 \times 10^{-2}$ | $4.81 \times 10^{-4}$ | $2.92 \times 10^{-9}$  | $2.50 \times 10^{-4}$  | $7.31 \times 10^{-4}$ |
|              | ID4  | $1.97 \times 10^{-2}$ | $5.29 \times 10^{-9}$  | $7.18 \times 10^{-3}$  | $2.69 \times 10^{-2}$ | $6.72 \times 10^{-4}$ | $3.84 \times 10^{-9}$  | $3.49 \times 10^{-4}$  | $1.02 \times 10^{-3}$ |
|              | ID5  | $1.56 \times 10^{-2}$ | $4.31 \times 10^{-9}$  | $5.68 \times 10^{-3}$  | $2.13 \times 10^{-2}$ | $5.32 \times 10^{-4}$ | $3.14 \times 10^{-9}$  | $2.76 \times 10^{-4}$  | $8.08 \times 10^{-4}$ |
|              | ID6  | $1.34 \times 10^{-2}$ | $3.57 \times 10^{-9}$  | $4.89 \times 10^{-3}$  | $1.83 \times 10^{-2}$ | $4.58 \times 10^{-4}$ | $2.60 \times 10^{-9}$  | $2.38 \times 10^{-4}$  | $6.95 \times 10^{-4}$ |
|              | ID7  | $1.38 \times 10^{-1}$ | $3.58 \times 10^{-8}$  | $5.04 \times 10^{-2}$  | $1.89 \times 10^{-1}$ | $4.72 \times 10^{-3}$ | $2.60 \times 10^{-8}$  | $2.45 \times 10^{-3}$  | $7.16 \times 10^{-3}$ |
|              | ID8  | $1.48 \times 10^{-2}$ | $3.98 \times 10^{-9}$  | $5.40 \times 10^{-3}$  | $2.02 \times 10^{-2}$ | $5.06 \times 10^{-4}$ | $2.89 \times 10^{-9}$  | $2.62 \times 10^{-4}$  | $7.68 \times 10^{-4}$ |
|              | ID9  | $1.58 \times 10^{-2}$ | $4.07 \times 10^{-9}$  | $5.74 \times 10^{-3}$  | $2.15 \times 10^{-2}$ | $5.37 \times 10^{-4}$ | $2.96 \times 10^{-9}$  | $2.79 \times 10^{-4}$  | $8.16 \times 10^{-4}$ |
|              | ID10 | $5.01 \times 10^{-3}$ | $1.34 \times 10^{-9}$  | $1.83 \times 10^{-3}$  | $6.84 \times 10^{-3}$ | $1.71 \times 10^{-4}$ | $9.75 \times 10^{-10}$ | $8.87 \times 10^{-5}$  | $2.60 \times 10^{-4}$ |
|              | ID11 | $3.84 \times 10^{-3}$ | $1.01 \times 10^{-9}$  | $1.40 \times 10^{-3}$  | $5.24 \times 10^{-3}$ | $1.31 \times 10^{-4}$ | $7.34 \times 10^{-10}$ | $6.79 \times 10^{-5}$  | $1.99 \times 10^{-4}$ |
|              | ID12 | $4.43 \times 10^{-3}$ | $1.18 \times 10^{-9}$  | $1.61 \times 10^{-3}$  | $6.04 \times 10^{-3}$ | $1.51 \times 10^{-4}$ | $8.55 \times 10^{-10}$ | $7.83 \times 10^{-5}$  | $2.29 \times 10^{-4}$ |
|              | ID13 | $4.53 \times 10^{-3}$ | $1.24 \times 10^{-9}$  | $1.65 \times 10^{-3}$  | $6.18 \times 10^{-3}$ | $1.54 \times 10^{-4}$ | $9.01 \times 10^{-10}$ | $8.01 \times 10^{-5}$  | $2.34 \times 10^{-4}$ |
|              | ID14 | $1.71 \times 10^{-1}$ | $4.45 \times 10^{-8}$  | $6.23 \times 10^{-2}$  | $2.33 \times 10^{-1}$ | $5.83 \times 10^{-3}$ | $3.24 \times 10^{-8}$  | $3.02 \times 10^{-3}$  | $8.86 \times 10^{-3}$ |
|              | ID15 | $1.40 \times 10^{-2}$ | $3.78 \times 10^{-9}$  | $5.10 \times 10^{-3}$  | $1.91 \times 10^{-2}$ | $4.77 \times 10^{-4}$ | $2.75 \times 10^{-9}$  | $2.48 \times 10^{-4}$  | $7.25 \times 10^{-4}$ |
|              | ID16 | $1.22 \times 10^{-1}$ | $3.24 \times 10^{-8}$  | $4.45 \times 10^{-2}$  | $1.67 \times 10^{-1}$ | $4.16 \times 10^{-3}$ | $2.36 \times 10^{-8}$  | $2.16 \times 10^{-3}$  | $6.32 \times 10^{-3}$ |
|              | ID17 | $2.01 \times 10^{-2}$ | $5.45 \times 10^{-9}$  | $7.31 \times 10^{-3}$  | $2.74 \times 10^{-2}$ | $6.85 \times 10^{-4}$ | $3.97 \times 10^{-9}$  | $3.55 \times 10^{-4}$  | $1.04 \times 10^{-3}$ |
|              | ID18 | $2.26 \times 10^{-2}$ | $6.15 \times 10^{-9}$  | $8.23 \times 10^{-3}$  | $3.09 \times 10^{-2}$ | $7.71 \times 10^{-4}$ | $4.47 \times 10^{-9}$  | $4.00 \times 10^{-4}$  | $1.17 \times 10^{-3}$ |
|              | ID19 | $1.35 \times 10^{-2}$ | $3.63 \times 10^{-9}$  | $4.93 \times 10^{-3}$  | $1.85 \times 10^{-2}$ | $4.62 \times 10^{-4}$ | $2.64 \times 10^{-9}$  | $2.39 \times 10^{-4}$  | $7.01 \times 10^{-4}$ |
|              | ID20 | $1.03 \times 10^{-2}$ | $2.84 \times 10^{-9}$  | $3.76 \times 10^{-3}$  | $1.41 \times 10^{-2}$ | $3.52 \times 10^{-4}$ | $2.07 \times 10^{-9}$  | $1.83 \times 10^{-4}$  | $5.35 \times 10^{-4}$ |
| Outdoor dust | OD1  | $5.21 \times 10^{-2}$ | $1.47 \times 10^{-8}$  | $1.90 \times 10^{-2}$  | $7.10 \times 10^{-2}$ | $1.78 \times 10^{-3}$ | $1.07 \times 10^{-8}$  | $9.21 \times 10^{-4}$  | $2.70 \times 10^{-3}$ |
|              | OD2  | $1.43 \times 10^{-3}$ | $3.90 \times 10^{-10}$ | $5.19 \times 10^{-4}$  | $1.95 \times 10^{-3}$ | $4.86 \times 10^{-5}$ | $2.84 \times 10^{-10}$ | $2.52 \times 10^{-5}$  | $7.39 \times 10^{-5}$ |
|              | OD3  | $9.62 \times 10^{-3}$ | $2.55 \times 10^{-9}$  | $3.50 \times 10^{-3}$  | $1.31 \times 10^{-2}$ | $3.28 \times 10^{-4}$ | $1.86 \times 10^{-9}$  | $1.70 \times 10^{-4}$  | $4.98 \times 10^{-4}$ |
|              | OD4  | $9.91 \times 10^{-4}$ | $2.69 \times 10^{-10}$ | $3.61 \times 10^{-4}$  | $1.35 \times 10^{-3}$ | $3.38 \times 10^{-5}$ | $1.95 \times 10^{-10}$ | $1.75 \times 10^{-5}$  | $5.13 \times 10^{-5}$ |
|              | OD5  | $7.70 \times 10^{-2}$ | $2.00 \times 10^{-8}$  | $2.80 \times 10^{-2}$  | $1.05 \times 10^{-1}$ | $2.63 \times 10^{-3}$ | $1.45 \times 10^{-8}$  | $1.36 \times 10^{-3}$  | $3.99 \times 10^{-3}$ |
|              | OD6  | 0.00                  | 0.00                   | 0.00                   | 0.00                  | 0.00                  | 0.00                   | 0.00                   | 0.00                  |
|              | OD7  | $1.60 \times 10^{-1}$ | $4.46 \times 10^{-8}$  | $5.82 \times 10^{-2}$  | $2.18 \times 10^{-1}$ | $5.45 \times 10^{-3}$ | $3.24 \times 10^{-8}$  | $2.83 \times 10^{-3}$  | $8.28 \times 10^{-3}$ |
|              | OD8  | $8.74 \times 10^{-2}$ | $2.37 \times 10^{-8}$  | $3.18 \times 10^{-2}$  | $1.19 \times 10^{-1}$ | $2.98 \times 10^{-3}$ | $1.72 \times 10^{-8}$  | $1.55 \times 10^{-3}$  | $4.53 \times 10^{-3}$ |
|              | OD9  | $9.94 \times 10^{-3}$ | $2.67 \times 10^{-9}$  | $3.62 \times 10^{-3}$  | $1.36 \times 10^{-2}$ | $3.39 \times 10^{-4}$ | $1.94 \times 10^{-9}$  | $1.76 \times 10^{-4}$  | $5.15 \times 10^{-4}$ |
|              | OD10 | $6.00 \times 10^{-2}$ | $1.60 \times 10^{-8}$  | $2.18 \times 10^{-2}$  | $8.19 \times 10^{-2}$ | $2.05 \times 10^{-3}$ | $1.17 \times 10^{-8}$  | $1.06 \times 10^{-3}$  | $3.11 \times 10^{-3}$ |
|              | OD11 | $7.48 \times 10^{-3}$ | $2.02 \times 10^{-9}$  | $2.72 \times 10^{-3}$  | $1.02 \times 10^{-2}$ | $2.55 \times 10^{-4}$ | $1.47 \times 10^{-9}$  | $1.32 \times 10^{-4}$  | $3.87 \times 10^{-4}$ |
|              | OD12 | $2.17 \times 10^{-3}$ | $5.75 \times 10^{-10}$ | $7.90 \times 10^{-4}$  | $2.96 \times 10^{-3}$ | $7.40 \times 10^{-5}$ | $4.18 \times 10^{-10}$ | $3.84 \times 10^{-5}$  | $1.12 \times 10^{-4}$ |
|              | OD13 | $8.19 \times 10^{-3}$ | $2.15 \times 10^{-9}$  | $2.98 \times 10^{-3}$  | $1.12 \times 10^{-2}$ | $2.79 \times 10^{-4}$ | $1.56 \times 10^{-9}$  | $1.45 \times 10^{-4}$  | $4.24 \times 10^{-4}$ |
|              | OD14 | $5.98 \times 10^{-4}$ | $1.58 \times 10^{-10}$ | $2.18 \times 10^{-4}$  | $8.15 \times 10^{-4}$ | $2.04 \times 10^{-5}$ | $1.15 \times 10^{-10}$ | $1.06 \times 10^{-5}$  | $3.09 \times 10^{-5}$ |
|              | OD15 | $3.84 \times 10^{-3}$ | $1.03 \times 10^{-9}$  | $1.40 \times 10^{-3}$  | $5.24 \times 10^{-3}$ | $1.31 \times 10^{-4}$ | $7.52 \times 10^{-10}$ | $6.79 \times 10^{-5}$  | $1.99 \times 10^{-4}$ |
|              | OD16 | $1.33 \times 10^{-3}$ | $3.53 \times 10^{-10}$ | $4.84 \times 10^{-4}$  | $1.81 \times 10^{-3}$ | $4.53 \times 10^{-5}$ | $2.57 \times 10^{-10}$ | $2.35 \times 10^{-5}$  | $6.88 \times 10^{-5}$ |
|              | OD17 | $1.97 \times 10^{-2}$ | $5.29 \times 10^{-9}$  | $7.18 \times 10^{-3}$  | $2.69 \times 10^{-2}$ | $6.72 \times 10^{-4}$ | $3.84 \times 10^{-9}$  | $3.49 \times 10^{-4}$  | $1.02 \times 10^{-3}$ |
|              | OD18 | $1.39 \times 10^{-2}$ | $3.60 \times 10^{-9}$  | $5.06 \times 10^{-3}$  | $1.90 \times 10^{-2}$ | $4.74 \times 10^{-4}$ | $2.62 \times 10^{-9}$  | $2.46 \times 10^{-4}$  | $7.20 \times 10^{-4}$ |
|              | OD19 | $1.47 \times 10^{-1}$ | $4.01 \times 10^{-8}$  | $5.35 \times 10^{-2}$  | $2.01 \times 10^{-1}$ | $5.01 \times 10^{-3}$ | $2.91 \times 10^{-8}$  | $2.60 \times 10^{-3}$  | $7.61 \times 10^{-3}$ |
|              | OD20 | $6.32 \times 10^{-3}$ | $1.71 \times 10^{-9}$  | $2.30 \times 10^{-3}$  | $8.61 \times 10^{-3}$ | $2.15 \times 10^{-4}$ | $1.24 \times 10^{-9}$  | $1.12 \times 10^{-4}$  | $3.27 \times 10^{-4}$ |
| Soil         | S1   | $1.97 \times 10^{-2}$ | $5.29 \times 10^{-9}$  | $7.18 \times 10^{-3}$  | $2.69 \times 10^{-2}$ | $6.72 \times 10^{-4}$ | $3.84 \times 10^{-9}$  | $3.49 \times 10^{-4}$  | $1.02 \times 10^{-3}$ |
|              | S2   | $1.49 \times 10^{-1}$ | $3.96 \times 10^{-8}$  | $5.41 \times 10^{-2}$  | $2.03 \times 10^{-1}$ | $5.07 \times 10^{-3}$ | $2.88 \times 10^{-8}$  | $2.63 \times 10^{-3}$  | $7.70 \times 10^{-3}$ |
|              | S3   | $6.19 \times 10^{-2}$ | $1.68 \times 10^{-8}$  | $2.25 \times 10^{-2}$  | $8.44 \times 10^{-2}$ | $2.11 \times 10^{-3}$ | $1.22 \times 10^{-8}$  | $1.09 \times 10^{-3}$  | $3.20 \times 10^{-3}$ |
|              | S4   | $2.62 \times 10^{-1}$ | $6.87 \times 10^{-8}$  | $9.54 \times 10^{-2}$  | $3.58 \times 10^{-1}$ | $8.94 \times 10^{-3}$ | $5.00 \times 10^{-8}$  | $4.64 \times 10^{-3}$  | $1.36 \times 10^{-2}$ |
|              | S5   | $1.56 \times 10^{-2}$ | $4.31 \times 10^{-9}$  | $5.68 \times 10^{-3}$  | $2.13 \times 10^{-2}$ | $5.32 \times 10^{-4}$ | $3.14 \times 10^{-9}$  | $2.76 \times 10^{-4}$  | $8.08 \times 10^{-4}$ |
|              | S6   | $2.40 \times 10^{-1}$ | $6.15 \times 10^{-8}$  | $8.72 \times 10^{-2}$  | $3.27 \times 10^{-1}$ | $8.17 \times 10^{-3}$ | $4.47 \times 10^{-8}$  | $4.24 \times 10^{-3}$  | $1.24 \times 10^{-2}$ |
|              | S7   | $1.42 \times 10^{-1}$ | $3.79 \times 10^{-8}$  | $5.17 \times 10^{-2}$  | $1.94 \times 10^{-1}$ | $4.84 \times 10^{-3}$ | $2.76 \times 10^{-8}$  | $2.51 \times 10^{-3}$  | $7.36 \times 10^{-3}$ |
|              | S8   | $1.80 \times 10^{-1}$ | $4.58 \times 10^{-8}$  | $6.55 \times 10^{-2}$  | $2.46 \times 10^{-1}$ | $6.14 \times 10^{-3}$ | $3.33 \times 10^{-8}$  | $3.18 \times 10^{-3}$  | $9.32 \times 10^{-3}$ |
|              | S9   | $6.49 \times 10^{-2}$ | $1.73 \times 10^{-8}$  | $2.36 \times 10^{-2}$  | $8.86 \times 10^{-2}$ | $2.21 \times 10^{-3}$ | $1.26 \times 10^{-8}$  | $1.15 \times 10^{-3}$  | $3.36 \times 10^{-3}$ |
|              | S10  | $1.08 \times 10^{-1}$ | $3.01 \times 10^{-8}$  | $3.92 \times 10^{-2}$  | $1.47 \times 10^{-1}$ | $3.67 \times 10^{-3}$ | $2.19 \times 10^{-8}$  | $1.91 \times 10^{-3}$  | $5.58 \times 10^{-3}$ |
|              | S11  | $1.78 \times 10^{-1}$ | $5.18 \times 10^{-8}$  | $6.49 \times 10^{-2}$  | $2.43 \times 10^{-1}$ | $6.08 \times 10^{-3}$ | $3.77 \times 10^{-8}$  | $3.15 \times 10^{-3}$  | $9.23 \times 10^{-3}$ |
|              | S12  | $5.84 \times 10^{-1}$ | $1.61 \times 10^{-7}$  | $2.13 \times 10^{-1}$  | $7.96 \times 10^{-1}$ | $1.99 \times 10^{-2}$ | $1.17 \times 10^{-7}$  | $1.03 \times 10^{-2}$  | $3.02 \times 10^{-2}$ |
|              | S13  | $6.28 \times 10^{-1}$ | $1.75 \times 10^{-7}$  | $2.28 \times 10^{-1}$  | $8.56 \times 10^{-1}$ | $2.14 \times 10^{-2}$ | $1.27 \times 10^{-7}$  | $1.11 \times 10^{-2}$  | $3.25 \times 10^{-2}$ |
|              | S14  | $4.99 \times 10^{-2}$ | $1.34 \times 10^{-8}$  | $1.81 \times 10^{-2}$  | $6.80 \times 10^{-2}$ | $1.70 \times 10^{-3}$ | $9.78 \times 10^{-9}$  | $8.82 \times 10^{-4}$  | $2.58 \times 10^{-3}$ |
|              | S15  | $3.34 \times 10^{-1}$ | $8.95 \times 10^{-8}$  | $1.21 \times 10^{-1}$  | $4.55 \times 10^{-1}$ | $1.14 \times 10^{-2}$ | $6.51 \times 10^{-8}$  | $5.90 \times 10^{-3}$  | $1.73 \times 10^{-2}$ |
|              | S16  | $2.20 \times 10^{-1}$ | $6.86 \times 10^{-8}$  | $8.01 \times 10^{-2}$  | $3.00 \times 10^{-1}$ | $7.50 \times 10^{-3}$ | $4.99 \times 10^{-8}$  | $3.89 \times 10^{-3}$  | $1.14 \times 10^{-2}$ |

|     |                       |                        |                       |                                         |                       |                        |                       |                                         |
|-----|-----------------------|------------------------|-----------------------|-----------------------------------------|-----------------------|------------------------|-----------------------|-----------------------------------------|
| S17 | $2.61 \times 10^{-1}$ | $7.06 \times 10^{-8}$  | $9.48 \times 10^{-2}$ | <b><math>3.55 \times 10^{-1}</math></b> | $8.88 \times 10^{-3}$ | $5.13 \times 10^{-8}$  | $4.61 \times 10^{-3}$ | <b><math>1.35 \times 10^{-2}</math></b> |
| S18 | $1.92 \times 10^{-1}$ | $5.16 \times 10^{-8}$  | $7.00 \times 10^{-2}$ | <b><math>2.62 \times 10^{-1}</math></b> | $6.55 \times 10^{-3}$ | $3.76 \times 10^{-8}$  | $3.40 \times 10^{-3}$ | <b><math>9.95 \times 10^{-3}</math></b> |
| S19 | $1.39 \times 10^{-3}$ | $3.72 \times 10^{-10}$ | $5.04 \times 10^{-4}$ | <b><math>1.89 \times 10^{-3}</math></b> | $4.72 \times 10^{-5}$ | $2.70 \times 10^{-10}$ | $2.45 \times 10^{-5}$ | <b><math>7.17 \times 10^{-5}</math></b> |
| S20 | $2.82 \times 10^{-2}$ | $9.13 \times 10^{-9}$  | $1.03 \times 10^{-2}$ | <b><math>3.84 \times 10^{-2}</math></b> | $9.60 \times 10^{-4}$ | $6.64 \times 10^{-9}$  | $4.98 \times 10^{-4}$ | <b><math>1.46 \times 10^{-3}</math></b> |

**Table S14:** Summary of diagnostic ratios for PAHs in indoor dust, outdoor dust and soils of Port Harcourt

| Ratio                             | Indoor Dust |      |        |      |       | Outdoor Dust |      |        |      |       | Soil |      |        |      |       |
|-----------------------------------|-------------|------|--------|------|-------|--------------|------|--------|------|-------|------|------|--------|------|-------|
|                                   | Mean        | SD   | Median | Min  | Max   | Mean         | SD   | Median | Min  | Max   | Mean | SD   | Median | Min  | Max   |
| Ant/(Ant + Phen)                  | 0.56        | 0.22 | 0.54   | 0.06 | 1.00  | 0.49         | 0.24 | 0.53   | 0.00 | 0.85  | 0.38 | 0.27 | 0.39   | 0.00 | 0.84  |
| Flt/(Flt + Pyr)                   | 0.49        | 0.19 | 0.51   | 0.00 | 0.81  | 0.46         | 0.28 | 0.50   | 0.00 | 1.00  | 0.48 | 0.29 | 0.58   | 0.00 | 0.97  |
| BaA/(BaA + Chry)                  | 0.48        | 0.17 | 0.46   | 0.00 | 0.74  | 0.35         | 0.28 | 0.33   | 0.00 | 0.83  | 0.40 | 0.29 | 0.36   | 0.00 | 0.91  |
| IndP/(IndP + BghiP)               | 0.45        | 0.23 | 0.41   | 0.00 | 0.91  | 0.42         | 0.16 | 0.46   | 0.00 | 0.69  | 0.47 | 0.17 | 0.46   | 0.15 | 0.82  |
| BaP/BghiP                         | 1.42        | 2.22 | 0.65   | 0.00 | 10.14 | 0.73         | 0.46 | 0.56   | 0.00 | 1.92  | 1.38 | 2.24 | 0.71   | 0.19 | 10.26 |
| LMW/HMW                           | 1.80        | 1.58 | 1.14   | 0.18 | 5.96  | 1.79         | 2.47 | 0.96   | 0.18 | 10.13 | 1.09 | 1.52 | 0.67   | 0.00 | 6.04  |
| $\Sigma$ COMB-PAHs/ $\Sigma$ PAHs | 0.39        | 0.18 | 0.40   | 0.14 | 0.79  | 0.42         | 0.19 | 0.43   | 0.08 | 0.79  | 0.55 | 0.22 | 0.54   | 0.13 | 0.89  |
| Total Index                       | 10.10       | 2.25 | 9.84   | 4.96 | 14.14 | 8.59         | 3.55 | 9.27   | 0.50 | 14.12 | 7.94 | 4.02 | 9.53   | 0.94 | 13.58 |

**Table S15:** PCA of PAHs in indoor dust, outdoor dust and soils of Port Harcourt

|        | Indoor Dust   |               |               |               | Outdoor Dust  |               |               | Soil          |               |               |               |               |
|--------|---------------|---------------|---------------|---------------|---------------|---------------|---------------|---------------|---------------|---------------|---------------|---------------|
|        | Component     |               |               |               | Component     |               |               | Component     |               |               |               |               |
|        | 1             | 2             | 3             | 4             | 1             | 2             | 3             | 1             | 2             | 3             | 4             | 5             |
| Nap    | -.187         | <b>.914</b>   | .143          | -.077         | .033          | .116          | .854          | .159          | .108          | .114          | .933          | .005          |
| 2-MNap | -.013         | .073          | .431          | -.595         | .163          | .791          | .214          | .729          | .280          | .329          | .270          | .238          |
| Acy    | .595          | <b>.752</b>   | -.064         | -.083         | .658          | .550          | .314          | .080          | .116          | .132          | -.012         | .922          |
| Ace    | .538          | <b>.708</b>   | .349          | -.089         | .628          | .642          | .250          | .228          | .285          | .692          | .272          | .407          |
| Flu    | .502          | <b>.812</b>   | .028          | -.055         | .314          | .821          | .165          | .954          | -.149         | .004          | -.031         | .132          |
| Phen   | .189          | .268          | <b>.828</b>   | -.193         | .396          | .781          | .330          | .975          | .097          | .121          | .097          | .027          |
| Ant    | .228          | <b>.927</b>   | -.024         | -.022         | .675          | .645          | .269          | .610          | -.206         | .060          | .526          | .207          |
| Flt    | <b>.988</b>   | .080          | .088          | -.023         | .741          | .429          | .169          | .955          | .088          | .056          | .135          | -.073         |
| Pyr    | .636          | .145          | <b>.679</b>   | -.215         | .937          | .296          | .091          | .570          | .301          | .440          | .577          | -.087         |
| BaA    | <b>.953</b>   | .176          | .153          | -.054         | .923          | .330          | .037          | .409          | -.063         | .840          | .087          | .183          |
| Chry   | <b>.960</b>   | .072          | .172          | -.047         | .907          | .297          | -.140         | .001          | .634          | .438          | .475          | -.193         |
| BbF    | <b>.550</b>   | .443          | .244          | .269          | .911          | .347          | .023          | .576          | .283          | .625          | .039          | -.166         |
| BkF    | .384          | -.117         | <b>.874</b>   | .090          | .865          | .458          | -.035         | .012          | .180          | .930          | .040          | .073          |
| BaP    | .161          | -.119         | <b>.919</b>   | .136          | .601          | .744          | -.051         | -.177         | .468          | .624          | .200          | -.066         |
| DahA   | -.086         | .524          | <b>.780</b>   | .069          | .411          | .625          | -.332         | .040          | .920          | .276          | .123          | .061          |
| IndP   | -.181         | .556          | .554          | .371          | .465          | .859          | -.005         | .087          | .883          | -.019         | -.212         | .163          |
| BghiP  | -.065         | -.037         | .206          | <b>.796</b>   | .438          | .803          | -.143         | .067          | .878          | .173          | .186          | .047          |
| % Var. | <b>27.930</b> | <b>25.705</b> | <b>24.516</b> | <b>7.892</b>  | <b>42.248</b> | <b>36.352</b> | <b>7.873</b>  | <b>27.223</b> | <b>20.527</b> | <b>20.478</b> | <b>11.920</b> | <b>7.578</b>  |
| Cumm % | <b>27.930</b> | <b>53.635</b> | <b>78.151</b> | <b>86.043</b> | <b>42.248</b> | <b>78.600</b> | <b>86.474</b> | <b>27.223</b> | <b>47.750</b> | <b>68.229</b> | <b>80.148</b> | <b>87.726</b> |



## REFERENCES

- 1 E.M.J. Verbruggen, Environmental risk limits for polycyclic aromatic hydrocarbons (PAHs): For direct aquatic, benthic, and terrestrial toxicity. *RIVM Report 607711007/2012*, 2012, 337pp.
- 2 D.F. Kalf, T. Crommentuijn and E.J. van de Plassche, Environmental quality objectives for 10 polycyclic aromatic hydrocarbons (PAHs), *Ecotoxicol. Environ. Saf.*, 1997, **36**, 89-97.
- 3 United States Environmental Protection Agency (US EPA), Risk-based concentration Table. US Environmental Protection Agency, Region 111 (Third Quarter). 1993.
- 4 J.L. Durant, W.F. Busby, A.L. Lafleur, B.W. Penman and C.L. Crespi, Human cell mutagenicity of oxygenated, nitrated and unsubstituted polycyclic aromatic hydrocarbons associated with urban aerosols, *Mutat. Res. - Genet. Toxicol.*, 1996, **371**, 123-157.
- 5 United States Environmental Protection Agency (US EPA), Mid-Atlantic risk assessment, Regional Screening Level (RSL). Summary Table. Available online: <http://www.epa.gov/region9/surperfund/prg/>. 2012.
- 6 United States Department of Energy (US DOE), The risk assessment information system (RAIS). US Department of Energy, Oak Ridge Operations (ORO) Office: Oak Ridge, TN, USA. 2011.
- 7 United States Environmental Protection Agency (US EPA), Regional screening levels (RSL) summary tables. Available online: <http://www.epa.gov/risk/risk-based-screening-table-generic-tables>, accessed on April 21, 2010.
- 8 United States Environmental Protection Agency (US EPA), Exposure factor handbook 2011 edition EPA/600/R-090/052F. National Center for Environmental Assessment, Office of Research and Development, US Environmental Protection Agency, Washington DC. Available online: <https://cfpub.epa.gov/ncea/risk/recordisplay.c>, 2011.
- 9 United States Environmental Protection Agency (US EPA), Human health evaluation manual, supplemental guidance: Update of standard default exposure factors. OSWER Directive 9200. 1-120. Available online: [https://www.epa.gov/sites/production/files/2015-11/documents/oswer\\_directive\\_9200.1-120\\_exposurefactors\\_corre](https://www.epa.gov/sites/production/files/2015-11/documents/oswer_directive_9200.1-120_exposurefactors_corre), 2014.
- 10 United States Environmental Protection Agency (US EPA), Risk Assessment Guidance for Superfund (RAGS). Vol. III-Part A, Process for conducting probabilistic risk

assessment. EPA 540-R-02-002. Office of Emergency and Remedial Response, US Environmental Protection Agency, Washington, DC., 2001.

- 11 United States Environmental Protection Agency (US EPA), Risk assessment guidance for Superfund, Vol. I: Human health evaluation manual. Office of Solid Waste and Emergency Response EPA/540/1-89/002. 1989.
- 12 World Health Organization (WHO), Nigeria: Life Expectancy. Available online: <https://www.worldlifeexpectancy.com/nigeria-life-expectancy>, 2018. Accessed on December 10th, 2018.
